# Supplementary material for: Sertoli-cell-specific knockout of connexin 43 leads to multiple alterations in testicular gene expression in prepubertal mice
Source: PubMed Central journal article supplement — Dis Model Mech. 2012 Jun 14;5(6):895–913. doi: 10.1242/dmm.008649 (PMC3484871; doi:10.1242/dmm.008649), 2012-06-14
Supplement: supp_008649_DMM008649FigS1.pdf [file supp_008649_DMM008649FigS1.pdf]

**Supplemental Table 1a**

| ACCN        | Gene Symbol          | Gene Name                                                       | T-Test p-value | RP p-value | FC KO WT |
|-------------|----------------------|-----------------------------------------------------------------|----------------|------------|----------|
| NM_009606.1 | <i>Acta1</i>         | actin, alpha 1, skeletal muscle                                 | 0.01           | 0.00       | 12.0     |
| NM_009610.1 | <i>Actg2</i>         | actin, gamma 2, smooth muscle, enteric                          | 0.01           | 0.00       | 2.2      |
| NM_009626.2 | <i>Adh7</i>          | alcohol dehydrogenase 7 (class IV), mu or sigma polypeptide     | 0.01           | 0.00       | 3.6      |
| NM_028121.2 | <i>Adpgk</i>         | ADP-dependent glucokinase                                       | 0.00           | 0.00       | 21.5     |
| AI574175.1  | <i>AI574175</i>      | expressed sequence AI574175                                     | 0.03           | 0.00       | 2.1      |
| NM_009731.1 | <i>Akr1b7</i>        | aldo-keto reductase family 1, member B7                         | 0.03           | 0.00       | 2.5      |
| NM_177275.2 | <i>Amigo3</i>        | amphoterin induced gene and ORF 3                               | 0.01           | 0.00       | 2.5      |
| NM_029898.1 | <i>Ankrd55</i>       | ankyrin repeat domain 55                                        | 0.03           | 0.00       | 2.1      |
| NM_009685.1 | <i>Apbb1</i>         | amyloid beta (A4) precursor protein-binding, family B, member 1 | 0.01           | 0.00       | 2.5      |
| NM_007473.3 | <i>Aqp7</i>          | aquaporin 7                                                     | 0.02           | 0.00       | 2.7      |
| AI506359.1  | <i>Arhgef12</i>      | Rho guanine nucleotide exchange factor (GEF) 12                 | 0.01           | 0.00       | 6.0      |
| AK044114.1  | <i>B230208B08Rik</i> | RIKEN cDNA B230208B08 gene                                      | 0.03           | 0.00       | 2.5      |
| BM938798.1  | <i>Cadps</i>         | Ca <sup>2+</sup> -dependent secretion activator                 | 0.01           | 0.00       | 3.2      |
| NM_011332.2 | <i>Ccl17</i>         | chemokine (C-C motif) ligand 17                                 | 0.00           | 0.00       | 3.0      |
| NM_009139.1 | <i>Ccl6</i>          | chemokine (C-C motif) ligand 6                                  | 0.04           | 0.00       | 2.7      |
| NM_011338.1 | <i>Ccl9</i>          | chemokine (C-C motif) ligand 9                                  | 0.02           | 0.00       | 3.1      |
| NM_007686.1 | <i>Cfi</i>           | complement component factor i                                   | 0.00           | 0.00       | 2.2      |
| NM_172621.1 | <i>Clic5</i>         | chloride intracellular channel 5                                | 0.00           | 0.00       | 2.5      |
| NM_009922.2 | <i>Cnn1</i>          | calponin 1                                                      | 0.03           | 0.00       | 2.2      |
| NM_031396.1 | <i>Cnnm1</i>         | cyclin M1                                                       | 0.01           | 0.00       | 2.5      |
| BX528891.1  | <i>Cnnm1</i>         | cyclin M1                                                       | 0.00           | 0.00       | 2.3      |
| NM_027024.2 | <i>Cst13</i>         | cystatin 13                                                     | 0.01           | 0.00       | 2.0      |
| NM_009978.1 | <i>Cst8</i>          | cystatin 8 (cystatin-related epididymal spermatogenic)          | 0.00           | 0.00       | 2.1      |
| NM_007817.1 | <i>Cyp2f2</i>        | cytochrome P450, family 2, subfamily f, polypeptide 2           | 0.01           | 0.00       | 2.6      |
| NM_139219.1 | <i>Defb9</i>         | defensin beta 9                                                 | 0.02           | 0.00       | 3.7      |
| BB343266.2  | <i>Dip2b</i>         | DIP2 disco-interacting protein 2 homolog B (Drosophila)         | 0.02           | 0.00       | 2.1      |
| NM_020265.3 | <i>Dkk2</i>          | dickkopf homolog 2 (Xenopus laevis)                             | 0.00           | 0.00       | 6.0      |
| AK020222.1  | <i>Dnhd1</i>         | dynein heavy chain domain 1                                     | 0.03           | 0.00       | 2.1      |
| NM_176933.3 | <i>Dusp4</i>         | dual specificity phosphatase 4                                  | 0.03           | 0.00       | 2.1      |
| AK087736.1  | <i>E330013P06</i>    | hypothetical protein E330013P06                                 | 0.01           | 0.00       | 4.2      |
| NM_133362.1 | <i>Erdr1</i>         | erythroid differentiation regulator 1                           | 0.00           | 0.00       | 4.1      |

|             |                  |                                                             |      |      |     |
|-------------|------------------|-------------------------------------------------------------|------|------|-----|
| NM_010157.3 | <i>Esr2</i>      | estrogen receptor 2 (beta)                                  | 0.04 | 0.00 | 3.0 |
| AK078610.1  | <i>Fam155a</i>   | family with sequence similarity 155, member A               | 0.01 | 0.00 | 5.3 |
| NM_173446.1 | <i>Fam155a</i>   | family with sequence similarity 155, member A               | 0.02 | 0.00 | 2.6 |
| CF578283.1  | <i>Gpc6</i>      | glypican 6                                                  | 0.01 | 0.00 | 2.2 |
| NM_010352.1 | <i>Gsg1</i>      | germ cell-specific gene 1                                   | 0.03 | 0.00 | 2.3 |
| BC082537.1  | <i>Hepacam</i>   | hepatocyte cell adhesion molecule                           | 0.03 | 0.00 | 2.8 |
| NM_175189.3 | <i>Hepacam</i>   | hepatocyte cell adhesion molecule                           | 0.01 | 0.00 | 2.2 |
| CK334862.1  | <i>Hist1h2ae</i> | histone cluster 1, H2ae                                     | 0.02 | 0.00 | 2.1 |
| NM_008263.1 | <i>Hoxa10</i>    | homeobox A10                                                | 0.01 | 0.00 | 5.2 |
| NM_010450.1 | <i>Hoxa11</i>    | homeo box A11                                               | 0.00 | 0.00 | 4.8 |
| NM_008273.1 | <i>Hoxd11</i>    | homeobox D11                                                | 0.01 | 0.00 | 3.0 |
| BY762577.1  | <i>Ikzf3</i>     | IKAROS family zinc finger 3                                 | 0.00 | 0.00 | 2.0 |
| BB245041.2  | <i>Kctd8</i>     | potassium channel tetramerisation domain containing 8       | 0.05 | 0.00 | 2.7 |
| NM_026324.1 | <i>Kirrel3</i>   | kin of IRRE like 3 (Drosophila)                             | 0.04 | 0.00 | 2.1 |
| BI106231.1  | <i>Kpna2</i>     | karyopherin (importin) alpha 2                              | 0.00 | 0.00 | 7.4 |
| NM_010701.1 | <i>Lect1</i>     | leukocyte cell derived chemotaxin 1                         | 0.05 | 0.00 | 2.1 |
| AK086355.1  | <i>Lsamp</i>     | limbic system-associated membrane protein                   | 0.03 | 0.00 | 2.1 |
| NM_008518.1 | <i>Ltb</i>       | lymphotoxin B                                               | 0.00 | 0.00 | 2.1 |
| AK004706.1  | <i>Mdga1</i>     | MAM domain containing glycosylphosphatidylinositol anchor 1 | 0.00 | 0.00 | 2.2 |
| BE943834.1  | <i>Meis2</i>     | Meis homeobox 2                                             | 0.05 | 0.00 | 2.1 |
| NM_010825.2 | <i>Meis2</i>     | Meis homeobox 2                                             | 0.00 | 0.00 | 2.1 |
| AK030913.1  | <i>Mid1</i>      | midline 1                                                   | 0.04 | 0.00 | 3.7 |
| CK330720.1  | <i>Mid1</i>      | midline 1                                                   | 0.03 | 0.00 | 3.5 |
| BI694853.1  | <i>Mid1</i>      | midline 1                                                   | 0.00 | 0.00 | 2.3 |
| AK034278.1  | <i>Mrap2</i>     | melanocortin 2 receptor accessory protein 2                 | 0.05 | 0.00 | 2.1 |
| NM_013602.2 | <i>Mt1</i>       | metallothionein 1                                           | 0.01 | 0.00 | 4.7 |
| NM_175418.3 | <i>Mybpc1</i>    | myosin binding protein C, slow-type                         | 0.02 | 0.00 | 2.8 |
| NM_175418.3 | <i>Mybpc1</i>    | myosin binding protein C, slow-type                         | 0.00 | 0.00 | 2.6 |
| NM_175418.3 | <i>Mybpc1</i>    | myosin binding protein C, slow-type                         | 0.02 | 0.00 | 2.0 |
| NM_146969.1 | <i>Olf1243</i>   | olfactory receptor 1243                                     | 0.01 | 0.00 | 2.1 |
| NM_146334.1 | <i>Olf1330</i>   | olfactory receptor 1330                                     | 0.00 | 0.00 | 2.0 |

|                |                   |                                                                                                  |      |      |      |
|----------------|-------------------|--------------------------------------------------------------------------------------------------|------|------|------|
| BC082538.1     | <i>P4ha3</i>      | procollagen-proline, 2-oxoglutarate 4-dioxygenase (proline 4-hydroxylase), alpha polypeptide III | 0.04 | 0.00 | 2.1  |
| NM_008791.2    | <i>Pcp4</i>       | Purkinje cell protein 4                                                                          | 0.00 | 0.00 | 59.8 |
| AK035507.1     | <i>Pgm5</i>       | phosphoglucomutase 5                                                                             | 0.00 | 0.00 | 2.4  |
| AI929868.1     | <i>Plcb1</i>      | phospholipase C, beta 1                                                                          | 0.03 | 0.00 | 3.0  |
| NM_023127.1    | <i>Polr2k</i>     | polymerase (RNA) II (DNA directed) polypeptide K                                                 | 0.00 | 0.00 | 4.4  |
| BQ175159.1     | <i>Ppm1h</i>      | protein phosphatase 1H (PP2C domain containing)                                                  | 0.02 | 0.00 | 2.1  |
| AK079637.1     | <i>Ppp1r3g</i>    | protein phosphatase 1, regulatory (inhibitor) subunit 3G                                         | 0.01 | 0.00 | 2.9  |
| NM_008926.2    | <i>Prkg2</i>      | protein kinase, cGMP-dependent, type II                                                          | 0.00 | 0.00 | 2.6  |
| BE980253.1     | <i>Rab27b</i>     | RAB27b, member RAS oncogene family                                                               | 0.02 | 0.00 | 2.1  |
| BM244450.2     | <i>Ralgapa1</i>   | Ral GTPase activating protein, alpha subunit 1                                                   | 0.02 | 0.00 | 2.5  |
| NM_021477.3    | <i>Rbfox1</i>     | RNA binding protein, fox-1 homolog (C. elegans) 1                                                | 0.04 | 0.00 | 2.4  |
| NM_181596.2    | <i>Retnlg</i>     | resistin like gamma                                                                              | 0.03 | 0.00 | 2.4  |
| AK079512.1     | <i>Rgs10</i>      | regulator of G-protein signalling 10                                                             | 0.01 | 0.00 | 3.4  |
| AK122245.2     | <i>Rimbp2</i>     | RIMS binding protein 2                                                                           | 0.01 | 0.00 | 2.9  |
| AK038787.1     | <i>Robo1</i>      | roundabout homolog 1 (Drosophila)                                                                | 0.02 | 0.00 | 2.1  |
| AA726096.1     | <i>Rpl10a-ps2</i> | ribosomal protein L10A, pseudogene 2                                                             | 0.01 | 0.00 | 2.6  |
| NM_133982.1    | <i>Rpp25</i>      | ribonuclease P 25 subunit (human)                                                                | 0.01 | 0.00 | 2.3  |
| NM_009114.1    | <i>S100a9</i>     | S100 calcium binding protein A9 (calgranulin B)                                                  | 0.00 | 0.00 | 3.0  |
| BF453892.1     | <i>Serinc3</i>    | serine incorporator 3                                                                            | 0.02 | 0.00 | 2.0  |
| NM_009144.1    | <i>Sfrp2</i>      | secreted frizzled-related protein 2                                                              | 0.02 | 0.00 | 3.0  |
| AK012380.1     | <i>Shisa9</i>     | shisa homolog 9 (Xenopus laevis)                                                                 | 0.04 | 0.00 | 2.0  |
| NM_020258.2    | <i>Slc37a2</i>    | solute carrier family 37 (glycerol-3-phosphate transporter), member 2                            | 0.02 | 0.00 | 2.1  |
| NM_133924.1    | <i>Snx21</i>      | sorting nexin family member 21                                                                   | 0.04 | 0.00 | 3.2  |
| NM_009262.2    | <i>Spock1</i>     | sparc/osteonectin, cwcv and kazal-like domains proteoglycan 1                                    | 0.01 | 0.00 | 5.0  |
| NM_001001332.1 | <i>Stfa1</i>      | stefin A1                                                                                        | 0.00 | 0.00 | 4.1  |
| NM_025288.1    | <i>Stfa3</i>      | stefin A3                                                                                        | 0.01 | 0.00 | 2.6  |
| NM_017465.1    | <i>Sult2b1</i>    | sulfotransferase family, cytosolic, 2B, member 1                                                 | 0.02 | 0.00 | 2.9  |

|             |                      |                                                       |      |      |      |
|-------------|----------------------|-------------------------------------------------------|------|------|------|
| BE949104.1  | <i>Tacc2</i>         | transforming, acidic coiled-coil containing protein 2 | 0.04 | 0.00 | 2.8  |
| NM_153801.1 | <i>Tecrl</i>         | trans-2,3-enoyl-CoA reductase-like                    | 0.04 | 0.00 | 2.3  |
| AA920804.1  | <i>Themis</i>        | thymocyte selection associated                        | 0.03 | 0.00 | 2.0  |
| NM_177794.2 | <i>Tmem26</i>        | transmembrane protein 26                              | 0.02 | 0.00 | 4.2  |
| NM_009394.2 | <i>Tnnc2</i>         | troponin C2, fast                                     | 0.00 | 0.00 | 2.7  |
| AK053112.1  | <i>Tns1</i>          | tensin 1                                              | 0.02 | 0.00 | 3.1  |
| CA874096.1  | <i>Trps1</i>         | trichorhinophalangeal syndrome I (human)              | 0.04 | 0.00 | 2.1  |
| NM_020505.1 | <i>Vav3</i>          | vav 3 oncogene                                        | 0.02 | 0.00 | 2.7  |
| NM_134218.1 | <i>Vmn1r208</i>      | vomer nasal 1 receptor 208                            | 0.03 | 0.00 | 3.5  |
| AU067815.1  | <i>Xkr4</i>          | X Kell blood group precursor related family member 4  | 0.03 | 0.00 | 2.0  |
| AK048587.1  | <i>Zfp182</i>        | zinc finger protein 182                               | 0.02 | 0.00 | 2.2  |
| BF581959.1  | <i>Zfp949</i>        | zinc finger protein 949                               | 0.01 | 0.00 | 2.8  |
| NM_009573.3 | <i>Zic1</i>          | zinc finger protein of the cerebellum 1               | 0.02 | 0.00 | 2.9  |
| AK013590.1  | <i>2900024J01Rik</i> | RIKEN cDNA 2900024J01 gene                            | 0.04 | 0.00 | 3.4  |
| AK077867.1  | <i>2900097C17Rik</i> | RIKEN cDNA 2900097C17 gene                            | 0.00 | 0.00 | 6.8  |
| NM_183126.1 | <i>6030498E09Rik</i> | RIKEN cDNA 6030498E09 gene                            | 0.04 | 0.00 | 2.0  |
| AK034241.1  | <i>A930018M24Rik</i> | RIKEN cDNA A930018M24 gene                            | 0.02 | 0.00 | 3.9  |
| AK032000.1  |                      |                                                       | 0.01 | 0.00 | 11.8 |
| BC038320.1  |                      |                                                       | 0.00 | 0.00 | 7.3  |
| AW494725.1  |                      |                                                       | 0.05 | 0.00 | 4.5  |
| BU700460.1  |                      |                                                       | 0.01 | 0.00 | 3.8  |
| AK078237.1  |                      |                                                       | 0.01 | 0.00 | 3.3  |
| BG095502.1  |                      |                                                       | 0.01 | 0.00 | 2.9  |
| AK083974.1  |                      |                                                       | 0.01 | 0.00 | 2.8  |
| BM229163.2  |                      |                                                       | 0.01 | 0.00 | 2.7  |
| AK012039.1  |                      |                                                       | 0.02 | 0.00 | 2.6  |
| CB847142.2  |                      |                                                       | 0.01 | 0.00 | 2.5  |
| BM234787.2  |                      |                                                       | 0.02 | 0.00 | 2.5  |
| AK017987.1  |                      |                                                       | 0.01 | 0.00 | 2.5  |
| AK084170.1  |                      |                                                       | 0.00 | 0.00 | 2.5  |
| BM205157.2  |                      |                                                       | 0.01 | 0.00 | 2.4  |
| BQ174503.1  |                      |                                                       | 0.01 | 0.00 | 2.4  |
| BB450465.2  |                      |                                                       | 0.01 | 0.00 | 2.4  |
| BB804671.1  |                      |                                                       | 0.01 | 0.00 | 2.3  |
| BG070526.2  |                      |                                                       | 0.01 | 0.00 | 2.3  |
| BE952863.1  |                      |                                                       | 0.02 | 0.00 | 2.3  |
| AK077881.1  |                      |                                                       | 0.04 | 0.00 | 2.2  |
| AK038705.1  |                      |                                                       | 0.01 | 0.00 | 2.2  |
| AV297662.1  |                      |                                                       | 0.05 | 0.00 | 2.2  |
| BX512545.1  |                      |                                                       | 0.04 | 0.00 | 2.2  |
| AI585482.1  |                      |                                                       | 0.03 | 0.00 | 2.2  |
| AK018644.1  |                      |                                                       | 0.04 | 0.00 | 2.1  |
| BB315069.2  |                      |                                                       | 0.03 | 0.00 | 2.1  |

|            |  |  |      |      |     |
|------------|--|--|------|------|-----|
| AK087305.1 |  |  | 0.02 | 0.00 | 2.1 |
| BB268463.2 |  |  | 0.01 | 0.00 | 2.0 |
| BC062894.1 |  |  | 0.02 | 0.00 | 2.0 |

**Supplemental Table 1b**

| ACCN           | Gene Symbol     | Gene Name                                                                          | T-Test p-value | RP p-value | FC KO WT |
|----------------|-----------------|------------------------------------------------------------------------------------|----------------|------------|----------|
| NM_027669.1    | <i>41153</i>    | septin 12                                                                          | 0.00           | 0.00       | -2.6     |
| U43892.1       | <i>Abcb7</i>    | ATP-binding cassette, sub-family B (MDR/TAP), member 7                             | 0.02           | 0.00       | -2.1     |
| NM_009350.1    | <i>Adad1</i>    | adenosine deaminase domain containing 1 (testis specific)                          | 0.00           | 0.00       | -4.5     |
| AK015063.1     | <i>Adad2</i>    | adenosine deaminase domain containing 2                                            | 0.03           | 0.00       | -4.5     |
| NM_009623.1    | <i>Adcy8</i>    | adenylate cyclase 8                                                                | 0.03           | 0.00       | -4.9     |
| NM_172923.1    | <i>AI118078</i> | expressed sequence AI118078                                                        | 0.00           | 0.00       | -2.2     |
| BC042709.1     | <i>Aim1l</i>    | absent in melanoma 1-like                                                          | 0.00           | 0.00       | -5.1     |
| NM_009647.2    | <i>Ak4</i>      | adenylate kinase 4                                                                 | 0.00           | 0.00       | -2.1     |
| AK006382.1     | <i>Akap13</i>   | A kinase (PRKA) anchor protein 13                                                  | 0.02           | 0.00       | -2.0     |
| BY714766.1     | <i>Als2cr11</i> | amyotrophic lateral sclerosis 2 (juvenile) chromosome region, candidate 11 (human) | 0.00           | 0.00       | -3.6     |
| NM_175200.2    | <i>Als2cr11</i> | amyotrophic lateral sclerosis 2 (juvenile) chromosome region, candidate 11 (human) | 0.02           | 0.00       | -7.4     |
| NM_144524.1    | <i>Angel1</i>   | angel homolog 1 (Drosophila)                                                       | 0.02           | 0.00       | -2.0     |
| NM_178263.1    | <i>Ankrd27</i>  | ankyrin repeat domain 27 (VPS9 domain)                                             | 0.03           | 0.00       | -2.1     |
| BC096609.1     | <i>Ankrd34b</i> | ankyrin repeat domain 34B                                                          | 0.05           | 0.00       | -2.4     |
| NM_009677.3    | <i>Ap1g1</i>    | adaptor protein complex AP-1, gamma 1 subunit                                      | 0.04           | 0.00       | -2.1     |
| NM_018790.1    | <i>Arc</i>      | activity regulated cytoskeletal-associated protein                                 | 0.00           | 0.00       | -2.8     |
| NM_009705.1    | <i>Arg2</i>     | arginase type II                                                                   | 0.00           | 0.00       | -4.9     |
| AI840762.1     | <i>Arhgap44</i> | Rho GTPase activating protein 44                                                   | 0.03           | 0.00       | -3.2     |
| NM_019927.1    | <i>Arih1</i>    | ariadne ubiquitin-conjugating enzyme E2 binding protein homolog 1 (Drosophila)     | 0.03           | 0.00       | -2.0     |
| AK041237.1     | <i>Arl5b</i>    | ADP-ribosylation factor-like 5B                                                    | 0.00           | 0.00       | -2.6     |
| AK081550.1     | <i>Armc6</i>    | armadillo repeat containing 6                                                      | 0.01           | 0.00       | -2.3     |
| NM_027027.1    | <i>Asb9</i>     | ankyrin repeat and SOCS box-containing 9                                           | 0.00           | 0.00       | -2.5     |
| NM_008554.2    | <i>Ascl2</i>    | achaete-scute complex homolog 2 (Drosophila)                                       | 0.00           | 0.00       | -2.3     |
| NM_023729.2    | <i>Asz1</i>     | ankyrin repeat, SAM and basic leucine zipper domain containing 1                   | 0.02           | 0.00       | -5.1     |
| NM_001029895.1 | <i>Ate1</i>     | arginyltransferase 1                                                               | 0.01           | 0.00       | -2.1     |

|             |                      |                                                         |      |      |       |
|-------------|----------------------|---------------------------------------------------------|------|------|-------|
| BC018510.1  | <i>Atf7ip2</i>       | activating transcription factor 7 interacting protein 2 | 0.04 | 0.00 | -2.4  |
| AK016180.1  | <i>Atf7ip2</i>       | activating transcription factor 7 interacting protein 2 | 0.00 | 0.00 | -2.9  |
| BC018510.1  | <i>Atf7ip2</i>       | activating transcription factor 7 interacting protein 2 | 0.02 | 0.00 | -3.1  |
| BI692011.1  | <i>Atp10b</i>        | ATPase, class V, type 10B                               | 0.01 | 0.00 | -4.5  |
| AA612185.1  | <i>Baz1a</i>         | bromodomain adjacent to zinc finger domain 1A           | 0.00 | 0.00 | -2.5  |
| BC013712.1  | <i>BC013712</i>      | cDNA sequence BC013712                                  | 0.01 | 0.00 | -2.1  |
| NM_145357.1 | <i>BC023105</i>      | cDNA sequence BC023105                                  | 0.03 | 0.00 | -3.7  |
| NM_153544.2 | <i>BC030867</i>      | cDNA sequence BC030867                                  | 0.01 | 0.00 | -2.0  |
| NM_177567.2 | <i>BC049762</i>      | cDNA sequence BC049762                                  | 0.00 | 0.00 | -5.7  |
| NM_172521.1 | <i>BC125332</i>      | cDNA sequence BC125332                                  | 0.01 | 0.00 | -12.9 |
| NM_177772.2 | <i>Bpil2</i>         | bactericidal/permeability-increasing protein-like 2     | 0.01 | 0.00 | -9.5  |
| BE957236.1  | <i>C030009O12Rik</i> | RIKEN cDNA C030009O12 gene                              | 0.02 | 0.00 | -9.3  |
| BQ174675.1  | <i>C1ql1</i>         | complement component 1, q subcomponent-like 1           | 0.00 | 0.00 | -2.6  |
| AK082309.1  | <i>C230036F13Rik</i> | RIKEN cDNA C230036F13 gene                              | 0.02 | 0.00 | -4.7  |
| AK082498.1  | <i>C230057A21Rik</i> | RIKEN cDNA C230057A21 gene                              | 0.01 | 0.00 | -2.1  |
| AK021218.1  | <i>C330022B21Rik</i> | RIKEN cDNA C330022B21 gene                              | 0.01 | 0.00 | -2.4  |
| AK082869.1  | <i>C430002E04Rik</i> | RIKEN cDNA C430002E04 gene                              | 0.00 | 0.00 | -5.5  |
| AK049571.1  | <i>C430042M11Rik</i> | RIKEN cDNA C430042M11 gene                              | 0.00 | 0.00 | -2.5  |
| NM_009793.1 | <i>Camk4</i>         | calcium/calmodulin-dependent protein kinase IV          | 0.00 | 0.00 | -5.3  |
| X62537.1    | <i>Cbx2</i>          | chromobox homolog 2 (Drosophila Pc class)               | 0.00 | 0.00 | -2.3  |
| BC006583.1  | <i>Ccdc136</i>       | coiled-coil domain containing 136                       | 0.03 | 0.00 | -2.2  |
| NM_177616.2 | <i>Ccdc157</i>       | coiled-coil domain containing 157                       | 0.02 | 0.00 | -2.1  |
| NM_144527.2 | <i>Ccdc21</i>        | coiled-coil domain containing 21                        | 0.04 | 0.00 | -2.3  |
| BC058624.1  | <i>Ccdc36</i>        | coiled-coil domain containing 36                        | 0.00 | 0.00 | -2.9  |
| NM_175430.2 | <i>Ccdc40</i>        | coiled-coil domain containing 40                        | 0.03 | 0.00 | -2.3  |
| BG066504.2  | <i>Ccnb1ip1</i>      | cyclin B1 interacting protein 1                         | 0.00 | 0.00 | -3.2  |
| NM_021893.2 | <i>Cd274</i>         | CD274 antigen                                           | 0.03 | 0.00 | -2.5  |
| NM_021893.2 | <i>Cd274</i>         | CD274 antigen                                           | 0.02 | 0.00 | -2.7  |
| NM_009864.1 | <i>Cdh1</i>          | cadherin 1                                              | 0.01 | 0.00 | -2.8  |
| NM_007662.1 | <i>Cdh15</i>         | cadherin 15                                             | 0.03 | 0.00 | -3.2  |

|             |                      |                                                                  |      |      |       |
|-------------|----------------------|------------------------------------------------------------------|------|------|-------|
| NM_009877.1 | <i>Cdkn2a</i>        | cyclin-dependent kinase inhibitor 2A                             | 0.00 | 0.00 | -4.4  |
| NM_009882.2 | <i>Cebpz</i>         | CCAAT/enhancer binding protein zeta                              | 0.02 | 0.00 | -2.0  |
| NM_176844.3 | <i>Chrna5</i>        | cholinergic receptor, nicotinic, alpha polypeptide 5             | 0.01 | 0.00 | -2.5  |
| BQ555385.1  | <i>Chrna7</i>        | cholinergic receptor, nicotinic, alpha polypeptide 7             | 0.02 | 0.00 | -2.2  |
| BC094889.1  | <i>Chrn4</i>         | cholinergic receptor, nicotinic, beta polypeptide 4              | 0.02 | 0.00 | -3.8  |
| NM_009904.1 | <i>Clgn</i>          | calmegin                                                         | 0.00 | 0.00 | -4.5  |
| NM_172469.1 | <i>Clic6</i>         | chloride intracellular channel 6                                 | 0.02 | 0.00 | -6.9  |
| NM_023420.1 | <i>Col4a3bp</i>      | collagen, type IV, alpha 3 (Goodpasture antigen) binding protein | 0.00 | 0.00 | -4.5  |
| NM_030052.2 | <i>Cox7b2</i>        | cytochrome c oxidase subunit VIIb2                               | 0.01 | 0.00 | -2.8  |
| NM_007755.1 | <i>Cpeb1</i>         | cytoplasmic polyadenylation element binding protein 1            | 0.04 | 0.00 | -3.1  |
| NM_013496.1 | <i>Crabp1</i>        | cellular retinoic acid binding protein I                         | 0.00 | 0.00 | -12.7 |
| X90648.1    | <i>Crkl</i>          | v-crk sarcoma virus CT10 oncogene homolog (avian)-like           | 0.02 | 0.00 | -2.1  |
| AW492342.1  | <i>Crxos1</i>        | Crx opposite strand transcript 1                                 | 0.01 | 0.00 | -3.6  |
| NM_008599.1 | <i>Cxcl9</i>         | chemokine (C-X-C motif) ligand 9                                 | 0.02 | 0.00 | -3.7  |
| NM_145548.1 | <i>Cyp2j13</i>       | cytochrome P450, family 2, subfamily j, polypeptide 13           | 0.02 | 0.00 | -2.6  |
| NM_177307.2 | <i>Cyp4f39</i>       | cytochrome P450, family 4, subfamily f, polypeptide 39           | 0.02 | 0.00 | -3.1  |
| J04847.1    | <i>D1Pas1</i>        | DNA segment, Chr 1, Pasteur Institute 1                          | 0.01 | 0.00 | -2.3  |
| NM_175326.2 | <i>D330045A20Rik</i> | RIKEN cDNA D330045A20 gene                                       | 0.00 | 0.00 | -4.4  |
| NM_010014.2 | <i>Dab1</i>          | disabled homolog 1 (Drosophila)                                  | 0.00 | 0.00 | -3.1  |
| NM_010021.2 | <i>Dazl</i>          | deleted in azoospermia-like                                      | 0.04 | 0.00 | -6.0  |
| AK019495.1  | <i>Ddx10</i>         | DEAD (Asp-Glu-Ala-Asp) box polypeptide 10                        | 0.02 | 0.00 | -2.6  |
| NM_013932.2 | <i>Ddx25</i>         | DEAD (Asp-Glu-Ala-Asp) box polypeptide 25                        | 0.03 | 0.00 | -4.1  |
| NM_010029.1 | <i>Ddx4</i>          | DEAD (Asp-Glu-Ala-Asp) box polypeptide 4                         | 0.03 | 0.00 | -5.4  |
| BC013672.1  | <i>Ddx60</i>         | DEAD (Asp-Glu-Ala-Asp) box polypeptide 60                        | 0.00 | 0.00 | -2.5  |
| BB513971.2  | <i>Ddx60</i>         | DEAD (Asp-Glu-Ala-Asp) box polypeptide 60                        | 0.04 | 0.00 | -2.8  |
| NM_177857.1 | <i>Dennd2c</i>       | DENN/MADD domain containing 2C                                   | 0.00 | 0.00 | -2.4  |



|                |                      |                                                                                           |      |      |       |
|----------------|----------------------|-------------------------------------------------------------------------------------------|------|------|-------|
| NM_144804.1    | <i>Depdc7</i>        | DEP domain containing 7                                                                   | 0.03 | 0.00 | -2.0  |
| NM_010059.1    | <i>Dmc1</i>          | DMC1 dosage suppressor of mck1 homolog, meiosis-specific homologous recombination (yeast) | 0.00 | 0.00 | -2.5  |
| AF020191.1     | <i>Dmrtb1</i>        | DMRT-like family B with proline-rich C-terminal, 1                                        | 0.04 | 0.00 | -68.2 |
| NM_027732.1    | <i>Dmrta2</i>        | doublesex and mab-3 related transcription factor like family C2                           | 0.00 | 0.00 | -7.3  |
| AK053672.1     | <i>Dmxl2</i>         | Dmx-like 2                                                                                | 0.02 | 0.00 | -2.9  |
| BF011365.1     | <i>Dnahc12</i>       | dynein, axonemal, heavy chain 12                                                          | 0.02 | 0.00 | -2.5  |
| NM_008299.1    | <i>Dnajb3</i>        | Dnaj (Hsp40) homolog, subfamily B, member 3                                               | 0.03 | 0.00 | -2.1  |
| NM_173383.1    | <i>Dnd1</i>          | dead end homolog 1 (zebrafish)                                                            | 0.00 | 0.00 | -2.5  |
| NM_001003960.1 | <i>Dnmt3b</i>        | DNA methyltransferase 3B (Dnmt3b), transcript variant 2                                   | 0.00 | 0.00 | -2.1  |
| NM_029761.2    | <i>Dok5</i>          | docking protein 5                                                                         | 0.02 | 0.00 | -2.1  |
| NM_010074.2    | <i>Dpp4</i>          | dipeptidylpeptidase 4                                                                     | 0.00 | 0.00 | -2.6  |
| NM_028615.1    | <i>Dppa2</i>         | developmental pluripotency associated 2                                                   | 0.00 | 0.00 | -2.9  |
| NM_139218.1    | <i>Dppa3</i>         | developmental pluripotency-associated 3                                                   | 0.01 | 0.00 | -3.4  |
| AK014832.1     | <i>Dscam1l1</i>      | Down syndrome cell adhesion molecule-like 1                                               | 0.03 | 0.00 | -2.7  |
| NM_023742.1    | <i>Dtx2</i>          | deltex 2 homolog (Drosophila)                                                             | 0.00 | 0.00 | -2.6  |
| NM_019819.2    | <i>Dusp14</i>        | dual specificity phosphatase 14                                                           | 0.00 | 0.00 | -2.1  |
| NM_029352.3    | <i>Dusp9</i>         | dual specificity phosphatase 9                                                            | 0.00 | 0.00 | -3.1  |
| AI451538.1     | <i>E330020D12Rik</i> | Riken cDNA E330020D12 gene                                                                | 0.04 | 0.00 | -2.0  |
| BC004721.1     | <i>Eaf2</i>          | ELL associated factor 2                                                                   | 0.00 | 0.00 | -6.9  |
| CA450918.1     | <i>Efcab10</i>       | EF-hand calcium binding domain 10                                                         | 0.03 | 0.00 | -2.0  |
| NM_028916.1    | <i>Efhc2</i>         | EF-hand domain (C-terminal) containing 2                                                  | 0.00 | 0.00 | -3.2  |
| NM_020596.1    | <i>Egr4</i>          | early growth response 4                                                                   | 0.02 | 0.00 | -2.8  |
| NM_007914.2    | <i>Ehf</i>           | ets homologous factor                                                                     | 0.00 | 0.00 | -2.7  |
| NM_021300.1    | <i>Ehox</i>          | ES cell derived homeobox containing gene (Ehox)                                           | 0.00 | 0.00 | -2.5  |
| NM_007939.1    | <i>Epha8</i>         | Eph receptor A8                                                                           | 0.02 | 0.00 | -2.1  |
| NM_181548.2    | <i>Eras</i>          | ES cell-expressed Ras                                                                     | 0.00 | 0.00 | -5.3  |
| NM_015774.2    | <i>Ero1l</i>         | ERO1-like ( <i>S. cerevisiae</i> )                                                        | 0.04 | 0.00 | -2.5  |
| NM_025276.2    | <i>Evpl</i>          | envoplakin                                                                                | 0.00 | 0.00 | -2.3  |
| NM_007974.2    | <i>F2rl1</i>         | coagulation factor II (thrombin) receptor-like 1                                          | 0.00 | 0.00 | -2.5  |
| NM_175449.3    | <i>Fam26f</i>        | family with sequence similarity 26, member F                                              | 0.03 | 0.00 | -2.6  |

|                |                |                                                                                     |      |      |      |
|----------------|----------------|-------------------------------------------------------------------------------------|------|------|------|
| NM_020622.1    | <i>Fam3b</i>   | family with sequence similarity 3, member B                                         | 0.05 | 0.00 | -3.8 |
| AK077262.1     | <i>Fam83g</i>  | family with sequence similarity 83, member G                                        | 0.00 | 0.00 | -3.0 |
| NM_145946.1    | <i>Fanci</i>   | Fanconi anemia, complementation group I                                             | 0.02 | 0.00 | -2.0 |
| AK082809.1     | <i>Fbxo15</i>  | F-box protein 15                                                                    | 0.04 | 0.00 | -2.0 |
| AK007274.1     | <i>Fbxw27</i>  | F-box and WD-40 domain protein 27                                                   | 0.00 | 0.00 | -2.1 |
| NM_053072.2    | <i>Fgd6</i>    | FYVE, RhoGEF and PH domain containing 6                                             | 0.01 | 0.00 | -2.2 |
| NM_023304.1    | <i>Fgf22</i>   | fibroblast growth factor 22                                                         | 0.01 | 0.00 | -2.9 |
| NM_010205.1    | <i>Fgf8</i>    | fibroblast growth factor 8                                                          | 0.00 | 0.00 | -3.3 |
| NM_012013.1    | <i>Figla</i>   | folliculogenesis specific basic helix-loop-helix                                    | 0.04 | 0.00 | -4.1 |
| NM_033571.1    | <i>Fkbp6</i>   | FK506 binding protein 6                                                             | 0.00 | 0.00 | -2.0 |
| NM_174993.1    | <i>Fmr1nb</i>  | fragile X mental retardation 1 neighbor                                             | 0.00 | 0.00 | -5.3 |
| NM_001007580.1 | <i>Fndc3c1</i> | fibronectin type III domain containing 3C1                                          | 0.00 | 0.00 | -2.2 |
| NM_010426.1    | <i>Foxf1a</i>  | forkhead box F1a                                                                    | 0.00 | 0.00 | -2.4 |
| BB437522.2     | <i>Foxf1a</i>  | forkhead box F1a                                                                    | 0.00 | 0.00 | -2.6 |
| NM_012020.1    | <i>Foxl2</i>   | forkhead box L2                                                                     | 0.03 | 0.00 | -2.3 |
| NM_183178.1    | <i>Fsd1</i>    | fibronectin type 3 and SPRY domain-containing protein                               | 0.00 | 0.00 | -3.5 |
| NM_031261.1    | <i>Fthl17</i>  | ferritin, heavy polypeptide-like 17 (Fthl17)                                        | 0.00 | 0.00 | -3.4 |
| M74515.1       | <i>Gabpa</i>   | GA repeat binding protein, alpha                                                    | 0.01 | 0.00 | -2.5 |
| NM_008069.3    | <i>Gabbr1</i>  | gamma-aminobutyric acid (GABA) A receptor, subunit beta 1                           | 0.02 | 0.00 | -6.5 |
| NM_010252.3    | <i>Gabrg1</i>  | gamma-aminobutyric acid (GABA) A receptor, subunit gamma 1                          | 0.00 | 0.00 | -6.7 |
| NM_172693.2    | <i>Galnt12</i> | UDP-N-acetyl-alpha-D-galactosamine:polypeptide N-acetylgalactosaminyltransferase 12 | 0.01 | 0.00 | -2.7 |
| NM_172451.1    | <i>Galnt6</i>  | UDP-N-acetyl-alpha-D-galactosamine:polypeptide N-acetylgalactosaminyltransferase 6  | 0.01 | 0.00 | -3.4 |
| NM_018734.2    | <i>Gbp3</i>    | guanylate binding protein 3                                                         | 0.00 | 0.00 | -7.7 |
| NM_008620.2    | <i>Gbp4</i>    | guanylate binding protein 4                                                         | 0.02 | 0.00 | -5.5 |
| NM_029509.2    | <i>Gbp8</i>    | guanylate-binding protein 8                                                         | 0.02 | 0.00 | -4.6 |
| NM_013528.2    | <i>Gfpt1</i>   | glutamine fructose-6-phosphate transaminase 1                                       | 0.02 | 0.00 | -3.3 |
| NM_008116.1    | <i>Ggt1</i>    | gamma-glutamyltransferase 1                                                         | 0.00 | 0.00 | -2.6 |

|                |                |                                                                 |      |      |       |
|----------------|----------------|-----------------------------------------------------------------|------|------|-------|
| NM_010288.2    | <i>Gja1</i>    | gap junction protein, alpha 1                                   | 0.00 | 0.00 | -3.4  |
| NM_147221.1    | <i>Glis1</i>   | GLIS family zinc finger 1                                       | 0.00 | 0.00 | -2.7  |
| BU937304.1     | <i>Gm12260</i> | histone cluster 1, H3 pseudogene                                | 0.02 | 0.00 | -2.3  |
| BB652115.1     | <i>Gm1679</i>  | predicted gene 1679                                             | 0.00 | 0.00 | -2.1  |
| AI449690.1     | <i>Gm3858</i>  | predicted gene 3858                                             | 0.02 | 0.00 | -3.9  |
| BE199336.1     | <i>Gm4841</i>  | predicted gene 4841                                             | 0.02 | 0.00 | -5.9  |
| AI196437.1     | <i>Gm4951</i>  | predicted gene 4951                                             | 0.00 | 0.00 | -8.6  |
| AI587854.1     | <i>Gm4984</i>  | predicted pseudogene 4984                                       | 0.01 | 0.00 | -2.8  |
| BY756231.1     | <i>Gm949</i>   | predicted gene 949                                              | 0.00 | 0.00 | -5.1  |
| AA718109.1     | <i>Gm960</i>   | predicted gene 960                                              | 0.00 | 0.00 | -2.5  |
| NM_008141.2    | <i>Gnat2</i>   | guanine nucleotide binding protein, alpha transducing 2 (Gnat2) | 0.00 | 0.00 | -3.1  |
| NM_022422.3    | <i>Gng13</i>   | guanine nucleotide binding protein 13, gamma (Gng13)            | 0.00 | 0.00 | -4.2  |
| NM_026680.2    | <i>Golt1a</i>  | golgi transport 1 homolog A (S. cerevisiae)                     | 0.01 | 0.00 | -4.3  |
| NM_029674.1    | <i>Got1l1</i>  | glutamic-oxaloacetic transaminase 1-like 1                      | 0.01 | 0.00 | -2.5  |
| NM_145890.1    | <i>Grhl1</i>   | grainyhead-like 1 (Drosophila)                                  | 0.05 | 0.00 | -3.8  |
| NM_145890.1    | <i>Grhl1</i>   | grainyhead-like 1 (Drosophila)                                  | 0.01 | 0.00 | -6.8  |
| NM_001013756.1 | <i>Grhl3</i>   | grainyhead-like 3 (Drosophila)                                  | 0.01 | 0.00 | -3.6  |
| AK036014.1     | <i>Grik3</i>   | glutamate receptor, ionotropic, kainate 3                       | 0.00 | 0.00 | -3.7  |
| NM_031391.1    | <i>Gtf2a1</i>  | general transcription factor II A, 1                            | 0.00 | 0.00 | -2.7  |
| NM_027000.2    | <i>Gtpbp4</i>  | GTP binding protein 4                                           | 0.01 | 0.00 | -2.1  |
| CN834482.1     | <i>Gtsf1</i>   | gametocyte specific factor 1                                    | 0.00 | 0.00 | -3.6  |
| NM_178747.2    | <i>Gulo</i>    | gulonolactone (L-) oxidase                                      | 0.01 | 0.00 | -2.9  |
| NM_010394.2    | <i>H2-Q7</i>   | histocompatibility 2, Q region locus 7                          | 0.02 | 0.00 | -3.0  |
| NM_146101.1    | <i>Habp2</i>   | hyaluronic acid binding protein 2                               | 0.01 | 0.00 | -2.7  |
| NM_008234.2    | <i>Hells</i>   | helicase, lymphoid specific                                     | 0.02 | 0.00 | -3.6  |
| NM_010416.1    | <i>Hemt1</i>   | hematopoietic cell transcript 1 (Hemt1)                         | 0.00 | 0.00 | -6.1  |
| AK017531.1     | <i>Herc3</i>   | hect domain and RLD 3                                           | 0.00 | 0.00 | -2.6  |
| CF425980.1     | <i>Hfm1</i>    | HFM1, ATP-dependent DNA helicase homolog (S. cerevisiae)        | 0.02 | 0.00 | -3.6  |
| AF117382.1     | <i>Hic2</i>    | hypermethylated in cancer 2                                     | 0.01 | 0.00 | -2.6  |
| NM_016660.1    | <i>Hmga1</i>   | high mobility group AT-hook 1                                   | 0.00 | 0.00 | -2.2  |
| NM_010445.1    | <i>Hmx1</i>    | H6 homeobox 1                                                   | 0.04 | 0.00 | -20.5 |
| NM_009330.1    | <i>Hnf1b</i>   | HNF1 homeobox B                                                 | 0.00 | 0.00 | -6.3  |
| NM_026489.1    | <i>Hormad1</i> | HORMA domain containing 1                                       | 0.02 | 0.00 | -7.7  |
| AK015939.1     | <i>Hormad2</i> | HORMA domain containing 2                                       | 0.04 | 0.00 | -2.6  |

|             |                |                                                                                            |      |      |      |
|-------------|----------------|--------------------------------------------------------------------------------------------|------|------|------|
| AK016553.1  | <i>Hsf2bp</i>  | heat shock transcription factor 2 binding protein                                          | 0.00 | 0.00 | -3.1 |
| CN837332.1  | <i>Hsf5</i>    | heat shock transcription factor family member 5                                            | 0.01 | 0.00 | -3.3 |
| U23921.1    | <i>Hspa4l</i>  | heat shock protein 4 like                                                                  | 0.00 | 0.00 | -2.5 |
| NM_016865.2 | <i>Htatip2</i> | HIV-1 tat interactive protein 2, homolog (human)                                           | 0.04 | 0.00 | -2.1 |
| NM_153072.1 | <i>Hus1b</i>   | Hus1 homolog b ( <i>S. pombe</i> )                                                         | 0.00 | 0.00 | -3.1 |
| NM_027407.2 | <i>Ica1l</i>   | islet cell autoantigen 1-like                                                              | 0.01 | 0.00 | -3.5 |
| NM_008331.1 | <i>Ifit1</i>   | interferon-induced protein with tetratricopeptide repeats 1                                | 0.01 | 0.00 | -6.3 |
| NM_010501.1 | <i>Ifit3</i>   | interferon-induced protein with tetratricopeptide repeats 3 ( <i>Ifit3</i> )               | 0.03 | 0.00 | -5.2 |
| NM_015777.1 | <i>Igfbp1b</i> | immunoglobulin (CD79A) binding protein 1b                                                  | 0.00 | 0.00 | -3.5 |
| NM_009951.2 | <i>Igf2bp1</i> | insulin-like growth factor 2 mRNA binding protein 1                                        | 0.00 | 0.00 | -2.5 |
| NM_018738.2 | <i>Igtp</i>    | interferon gamma induced GTPase                                                            | 0.03 | 0.00 | -5.0 |
| AK052469.1  | <i>Igtp</i>    | interferon gamma induced GTPase                                                            | 0.00 | 0.00 | -5.3 |
| NM_021792.3 | <i>Iigp1</i>   | interferon inducible GTPase 1 ( <i>Iigp1</i> )                                             | 0.03 | 0.00 | -7.7 |
| NM_021792.3 | <i>Iigp1</i>   | interferon inducible GTPase 1                                                              | 0.02 | 0.00 | -8.1 |
| NM_134109.1 | <i>Ildr1</i>   | immunoglobulin-like domain containing receptor 1                                           | 0.01 | 0.00 | -2.4 |
| NM_016851.1 | <i>Irf6</i>    | interferon regulatory factor 6                                                             | 0.00 | 0.00 | -3.3 |
| NM_016850.1 | <i>Irf7</i>    | interferon regulatory factor 7                                                             | 0.00 | 0.00 | -3.7 |
| NM_021459.2 | <i>Isl1</i>    | ISL1 transcription factor, LIM/homeodomain                                                 | 0.00 | 0.00 | -2.5 |
| NM_027721.1 | <i>Katnal2</i> | katanin p60 subunit A-like 2                                                               | 0.04 | 0.00 | -5.0 |
| NM_010598.2 | <i>Kcnab2</i>  | potassium voltage-gated channel, shaker-related subfamily, beta member 2 ( <i>Kcnab2</i> ) | 0.00 | 0.00 | -3.2 |
| NM_010601.2 | <i>Kcnh3</i>   | potassium voltage-gated channel, subfamily H (eag-related), member 3                       | 0.03 | 0.00 | -2.0 |
| NM_008430.1 | <i>Kcnk1</i>   | potassium channel, subfamily K, member 1                                                   | 0.00 | 0.00 | -2.5 |
| BM198622.2  | <i>Kdm5b</i>   | lysine (K)-specific demethylase 5B                                                         | 0.02 | 0.00 | -4.0 |
| NM_010616.1 | <i>Kif12</i>   | kinesin family member 12                                                                   | 0.01 | 0.00 | -2.1 |
| D12645.1    | <i>Kif3a</i>   | kinesin family member 3A                                                                   | 0.01 | 0.00 | -2.2 |
| BC057064.1  | <i>Klhdc10</i> | kelch domain containing 10                                                                 | 0.00 | 0.00 | -2.8 |
| NM_172565.1 | <i>Klhl11</i>  | kelch-like 11 ( <i>Drosophila</i> )                                                        | 0.00 | 0.00 | -2.7 |
| NM_172565.1 | <i>Klhl11</i>  | kelch-like 11 ( <i>Drosophila</i> )                                                        | 0.01 | 0.00 | -2.8 |

|             |                  |                                                                            |      |      |      |
|-------------|------------------|----------------------------------------------------------------------------|------|------|------|
| AK009417.1  | <i>Klrg2</i>     | killer cell lectin-like receptor subfamily G, member 2                     | 0.02 | 0.00 | -8.4 |
| NM_008468.1 | <i>Kpna6</i>     | karyopherin (importin) alpha 6                                             | 0.00 | 0.00 | -2.2 |
| NM_016958.1 | <i>Krt14</i>     | keratin 14                                                                 | 0.00 | 0.00 | -4.6 |
| NM_010663.1 | <i>Krt17</i>     | keratin 17                                                                 | 0.01 | 0.00 | -4.4 |
| AK009986.1  | <i>Krt24</i>     | keratin 24                                                                 | 0.01 | 0.00 | -3.2 |
| NM_031170.1 | <i>Krt8</i>      | keratin 8                                                                  | 0.00 | 0.00 | -3.4 |
| NM_027221.1 | <i>Krtcap3</i>   | keratinocyte associated protein 3                                          | 0.01 | 0.00 | -2.1 |
| NM_028622.1 | <i>Lce1c</i>     | late cornified envelope 1C                                                 | 0.05 | 0.00 | -2.2 |
| NM_013580.2 | <i>Ldhc</i>      | lactate dehydrogenase C                                                    | 0.00 | 0.00 | -3.5 |
| NM_010710.2 | <i>Lhx2</i>      | LIM homeobox protein 2                                                     | 0.00 | 0.00 | -2.9 |
| NM_008500.1 | <i>Lhx6</i>      | LIM homeobox protein 6                                                     | 0.00 | 0.00 | -4.1 |
| NM_010713.1 | <i>Lhx8</i>      | LIM homeobox protein 8                                                     | 0.00 | 0.00 | -4.6 |
| D49658.1    | <i>Lhx8</i>      | LIM homeobox protein 8                                                     | 0.01 | 0.00 | -7.4 |
| NM_145833.1 | <i>Lin28a</i>    | lin-28 homolog A (C. elegans)                                              | 0.01 | 0.00 | -2.4 |
| NM_057173.1 | <i>Lmo1</i>      | LIM domain only 1                                                          | 0.00 | 0.00 | -3.7 |
| CD541541.1  | <i>LOC673430</i> | zinc finger protein 160-like                                               | 0.03 | 0.00 | -2.6 |
| AK016522.1  | <i>Lonrf3</i>    | LON peptidase N-terminal domain and ring finger 3                          | 0.01 | 0.00 | -4.3 |
| NM_022983.2 | <i>Lpar3</i>     | lysophosphatidic acid receptor 3                                           | 0.01 | 0.00 | -2.6 |
| NM_029627.1 | <i>Ly6k</i>      | lymphocyte antigen 6 complex, locus K                                      | 0.00 | 0.00 | -2.2 |
| NM_175296.3 | <i>Mael</i>      | maelstrom homolog (Drosophila)                                             | 0.01 | 0.00 | -4.1 |
| BM225062.2  | <i>Magea10</i>   | melanoma antigen family A, 10                                              | 0.02 | 0.00 | -3.2 |
| NM_020018.1 | <i>Magea5</i>    | melanoma antigen, family A, 5 (Magea5)                                     | 0.03 | 0.00 | -7.0 |
| BC031147.1  | <i>Map3k15</i>   | mitogen-activated protein kinase kinase kinase 15                          | 0.00 | 0.00 | -3.1 |
| NM_008279.1 | <i>Map4k1</i>    | mitogen-activated protein kinase kinase kinase 1                           | 0.00 | 0.00 | -2.3 |
| NM_025979.2 | <i>Mastl</i>     | microtubule associated serine/threonine kinase-like                        | 0.00 | 0.00 | -2.3 |
| AY512920.1  | <i>Mdn1</i>      | midasin homolog (yeast)                                                    | 0.01 | 0.00 | -3.2 |
| NM_008578.1 | <i>Mef2b</i>     | myocyte enhancer factor 2B (Mef2b)                                         | 0.00 | 0.00 | -3.2 |
| NM_008588.1 | <i>Mesp1</i>     | mesoderm posterior 1                                                       | 0.01 | 0.00 | -4.8 |
| AK052278.1  | <i>Mgat4a</i>    | mannoside acetylglucosaminyltransferase 4, isoenzyme A                     | 0.01 | 0.00 | -2.8 |
| NM_177282.2 | <i>Mical2</i>    | microtubule associated monooxygenase, calponin and LIM domain containing 2 | 0.02 | 0.00 | -2.8 |
| NM_027696.1 | <i>Mier1</i>     | mesoderm induction early response 1 homolog (Xenopus laevis)               | 0.01 | 0.00 | -3.9 |

|             |                 |                                                                                       |      |      |      |
|-------------|-----------------|---------------------------------------------------------------------------------------|------|------|------|
| U81317.1    | <i>Mobp</i>     | myelin-associated oligodendrocytic basic protein                                      | 0.04 | 0.00 | -3.2 |
| NM_010816.1 | <i>Morc1</i>    | microrchidia 1                                                                        | 0.01 | 0.00 | -2.6 |
| AK084586.1  | <i>Mphosph9</i> | M-phase phosphoprotein 9                                                              | 0.02 | 0.00 | -2.3 |
| NM_031870.1 | <i>Msh4</i>     | mutS homolog 4 (E. coli)                                                              | 0.01 | 0.00 | -2.4 |
| AK030316.1  | <i>Mtap7d2</i>  | MAP7 domain containing 2                                                              | 0.01 | 0.00 | -4.6 |
| M74753.1    | <i>Myh3</i>     | myosin, heavy polypeptide 3, skeletal muscle, embryonic                               | 0.02 | 0.00 | -2.5 |
| AK039333.1  | <i>Naa30</i>    | N(alpha)-acetyltransferase 30, NatC catalytic subunit                                 | 0.02 | 0.00 | -2.9 |
| NM_031389.1 | <i>Nalp4c</i>   | leucine rich repeat and PYD containing 4C (Nalp4c)                                    | 0.00 | 0.00 | -2.7 |
| BC056473.1  | <i>Nanos1</i>   | nanos homolog 1 (Drosophila)                                                          | 0.01 | 0.00 | -3.8 |
| NM_145602.1 | <i>Ndr4</i>     | N-myc downstream regulated gene 4                                                     | 0.00 | 0.00 | -3.3 |
| BE915912.1  | <i>Necab3</i>   | N-terminal EF-hand calcium binding protein 3                                          | 0.00 | 0.00 | -2.8 |
| NM_011848.1 | <i>Nek3</i>     | NIMA (never in mitosis gene a)-related expressed kinase 3                             | 0.00 | 0.00 | -2.4 |
| AK083512.1  | <i>Neto2</i>    | neuropilin (NRP) and tolloid (TLL)-like 2                                             | 0.01 | 0.00 | -4.1 |
| BE292026.1  | <i>Nfib</i>     | nuclear factor I/B                                                                    | 0.01 | 0.00 | -2.6 |
| NM_008690.2 | <i>Nfkbie</i>   | nuclear factor of kappa light polypeptide gene enhancer in B-cells inhibitor, epsilon | 0.02 | 0.00 | -2.2 |
| NM_025998.1 | <i>Nkain1</i>   | Na <sup>+</sup> /K <sup>+</sup> transporting ATPase interacting 1                     | 0.00 | 0.00 | -2.6 |
| AF202039.1  | <i>Nkx2-4</i>   | NK2 transcription factor related, locus 4 (Drosophila)                                | 0.01 | 0.00 | -5.1 |
| NM_008708.1 | <i>Nmt2</i>     | N-myristoyltransferase 2                                                              | 0.00 | 0.00 | -2.8 |
| NM_021315.1 | <i>Noc3l</i>    | nucleolar complex associated 3 homolog (S. cerevisiae)                                | 0.00 | 0.00 | -2.4 |
| CF613235.1  | <i>Npw</i>      | neuropeptide W                                                                        | 0.00 | 0.00 | -3.1 |
| BM120306.2  | <i>Nr3c2</i>    | nuclear receptor subfamily 3, group C, member 2                                       | 0.01 | 0.00 | -2.1 |
| NM_020610.1 | <i>Nrip3</i>    | nuclear receptor interacting protein 3                                                | 0.00 | 0.00 | -3.8 |
| BU756239.1  | <i>Nup62cl</i>  | nucleoporin 62 C-terminal like                                                        | 0.00 | 0.00 | -2.3 |
| NM_170591.1 | <i>Nup1l</i>    | nucleoporin like 1                                                                    | 0.05 | 0.00 | -2.6 |
| NM_031259.1 | <i>Nxf2</i>     | nuclear RNA export factor 2                                                           | 0.01 | 0.00 | -5.5 |
| NM_145227.1 | <i>Oas2</i>     | 2'-5' oligoadenylate synthetase 2                                                     | 0.00 | 0.00 | -3.3 |
| NM_011854.1 | <i>Oasl2</i>    | 2'-5' oligoadenylate synthetase-like 2                                                | 0.04 | 0.00 | -3.1 |
| NM_207201.1 | <i>Olf8</i>     | olfactory receptor 8                                                                  | 0.03 | 0.00 | -2.0 |
| NM_011015.1 | <i>Orc1</i>     | origin recognition complex, subunit 1                                                 | 0.02 | 0.00 | -2.9 |
| NM_152818.2 | <i>Osbp2</i>    | oxysterol binding protein 2                                                           | 0.00 | 0.00 | -2.0 |
| CA570565.1  | <i>Osbp19</i>   | oxysterol binding protein-like 9                                                      | 0.02 | 0.00 | -2.0 |

|                |                |                                                               |      |      |       |
|----------------|----------------|---------------------------------------------------------------|------|------|-------|
| AK015275.1     | <i>Otud4</i>   | OTU domain containing 4                                       | 0.00 | 0.00 | -2.3  |
| NM_011023.2    | <i>Otx1</i>    | orthodenticle homolog 1 (Drosophila)                          | 0.03 | 0.00 | -9.4  |
| NM_019935.2    | <i>Ovo1</i>    | OVO homolog-like 1 (Drosophila)                               | 0.04 | 0.00 | -2.4  |
| NM_026924.2    | <i>Ovo2</i>    | ovo-like 2 (Drosophila)                                       | 0.02 | 0.00 | -2.1  |
| NM_011060.1    | <i>Padi3</i>   | peptidyl arginine deiminase, type III                         | 0.00 | 0.00 | -4.5  |
| NM_011035.1    | <i>Pak1</i>    | p21 protein (Cdc42/Rac)-activated kinase 1                    | 0.04 | 0.00 | -2.9  |
| BC052527.1     | <i>Pank4</i>   | pantothenate kinase 4                                         | 0.02 | 0.00 | -3.3  |
| AK005563.1     | <i>Parp14</i>  | poly (ADP-ribose) polymerase family, member 14                | 0.00 | 0.00 | -2.4  |
| NM_011040.2    | <i>Pax8</i>    | paired box gene 8                                             | 0.02 | 0.00 | -2.4  |
| NM_029508.1    | <i>Pcgf5</i>   | polycomb group ring finger 5                                  | 0.01 | 0.00 | -3.6  |
| NM_008806.1    | <i>Pde6b</i>   | phosphodiesterase 6B, cGMP, rod receptor, beta polypeptide    | 0.00 | 0.00 | -2.9  |
| BF534000.1     | <i>Pdxk</i>    | pyridoxal (pyridoxine, vitamin B6) kinase                     | 0.00 | 0.00 | -2.4  |
| NM_008821.1    | <i>Pet2</i>    | plasmacytoma expressed transcript 2                           | 0.01 | 0.00 | -2.1  |
| AK017146.1     | <i>Pgap1</i>   | post-GPI attachment to proteins 1                             | 0.00 | 0.00 | -3.2  |
| BB469950.2     | <i>Phb</i>     | prohibitin                                                    | 0.01 | 0.00 | -2.6  |
| NM_199299.1    | <i>Phf15</i>   | PHD finger protein 15                                         | 0.01 | 0.00 | -2.7  |
| AK004823.1     | <i>Phf15</i>   | PHD finger protein 15                                         | 0.00 | 0.00 | -4.3  |
| BI695483.1     | <i>Phf17</i>   | PHD finger protein 17                                         | 0.00 | 0.00 | -2.7  |
| NM_009434.2    | <i>Phlda2</i>  | pleckstrin homology-like domain, family A, member 2           | 0.00 | 0.00 | -10.4 |
| NM_178621.2    | <i>Phyipl</i>  | phytanoyl-CoA hydroxylase interacting protein-like            | 0.01 | 0.00 | -4.8  |
| BF450484.1     | <i>Pign</i>    | phosphatidylinositol glycan anchor biosynthesis, class N      | 0.04 | 0.00 | -2.3  |
| NM_029094.1    | <i>Pik3cb</i>  | phosphatidylinositol 3-kinase, catalytic, beta polypeptide    | 0.00 | 0.00 | -2.0  |
| NM_021308.1    | <i>Piwil2</i>  | piwi-like homolog 2 (Drosophila)                              | 0.03 | 0.00 | -5.9  |
| NM_001024145.1 | <i>Pla2g4f</i> | phospholipase A2, group IVF                                   | 0.00 | 0.00 | -3.1  |
| NM_172285.1    | <i>Plcg2</i>   | phospholipase C, gamma 2                                      | 0.01 | 0.00 | -2.1  |
| NM_183191.1    | <i>Plch1</i>   | phospholipase C, eta 1                                        | 0.01 | 0.00 | -4.5  |
| BG298178.1     | <i>Pnlnc1</i>  | poly(A)-specific ribonuclease (PARN)-like domain containing 1 | 0.04 | 0.00 | -2.4  |
| BB698563.1     | <i>Pnma5</i>   | paraneoplastic antigen family 5                               | 0.01 | 0.00 | -2.4  |
| NM_011138.1    | <i>Pou2f2</i>  | POU domain, class 2, transcription factor 2                   | 0.00 | 0.00 | -3.0  |
| NM_008900.1    | <i>Pou3f3</i>  | POU domain, class 3, transcription factor 3                   | 0.00 | 0.00 | -6.1  |
| NM_175363.2    | <i>Pphln1</i>  | periphilin 1                                                  | 0.00 | 0.00 | -2.7  |

|             |                 |                                                                                          |      |      |      |
|-------------|-----------------|------------------------------------------------------------------------------------------|------|------|------|
| NM_029948.1 | <i>Pramef12</i> | PRAME family member 12                                                                   | 0.01 | 0.00 | -7.3 |
| NM_031377.1 | <i>Pramel1</i>  | preferentially expressed antigen in melanoma-like 1                                      | 0.05 | 0.00 | -2.1 |
| NM_031390.1 | <i>Pramel3</i>  | preferentially expressed antigen in melanoma-like 3 (Pramel3)                            | 0.02 | 0.00 | -4.8 |
| BF152648.1  | <i>Prr19</i>    | proline rich 19                                                                          | 0.01 | 0.00 | -4.8 |
| AK006612.1  | <i>Prss44</i>   | protease, serine, 44                                                                     | 0.03 | 0.00 | -3.3 |
| NM_146227.2 | <i>Prss50</i>   | protease, serine, 50                                                                     | 0.04 | 0.00 | -2.5 |
| NM_133351.1 | <i>Prss8</i>    | protease, serine, 8 (prostasin)                                                          | 0.00 | 0.00 | -4.5 |
| NM_011178.2 | <i>Prtn3</i>    | proteinase 3                                                                             | 0.03 | 0.00 | -2.5 |
| AK010717.1  | <i>Psmas8</i>   | proteasome (prosome, macropain) subunit, alpha type, 8                                   | 0.03 | 0.00 | -2.4 |
| NM_013585.1 | <i>Psmb9</i>    | proteasome (prosome, macropain) subunit, beta type 9 (large multifunctional peptidase 2) | 0.04 | 0.00 | -3.1 |
| NM_016899.2 | <i>Rab25</i>    | RAB25, member RAS oncogene family                                                        | 0.01 | 0.00 | -2.1 |
| NM_011234.2 | <i>Rad51</i>    | RAD51 homolog ( <i>S. cerevisiae</i> )                                                   | 0.04 | 0.00 | -2.3 |
| AK076551.1  | <i>Rad51c</i>   | RAD51 homolog c ( <i>S. cerevisiae</i> )                                                 | 0.03 | 0.00 | -2.4 |
| W11780.1    | <i>Rap1gap</i>  | Rap1 GTPase-activating protein                                                           | 0.00 | 0.00 | -3.0 |
| NM_053268.1 | <i>Rasa2</i>    | RAS p21 protein activator 2                                                              | 0.05 | 0.00 | -2.1 |
| BF319710.1  | <i>Rasal2</i>   | RAS protein activator like 2                                                             | 0.01 | 0.00 | -3.4 |
| AK015898.1  | <i>Rasd2</i>    | RASD family, member 2                                                                    | 0.00 | 0.00 | -4.1 |
| BC042449.1  | <i>Rasgrf1</i>  | RAS protein-specific guanine nucleotide-releasing factor 1                               | 0.01 | 0.00 | -2.4 |
| NM_019547.1 | <i>Rbm38</i>    | RNA binding motif protein 38                                                             | 0.00 | 0.00 | -2.8 |
| NM_029660.1 | <i>Rbmxl2</i>   | RNA binding motif protein, X-linked-like 2                                               | 0.02 | 0.00 | -7.3 |
| NM_011253.1 | <i>Rbmy1a1</i>  | RNA binding motif protein, Y chromosome, family 1, member A1                             | 0.01 | 0.00 | -4.8 |
| NM_020002.2 | <i>Rec8</i>     | REC8 homolog (yeast)                                                                     | 0.01 | 0.00 | -2.4 |
| NM_058214.1 | <i>Recq14</i>   | RecQ protein-like 4                                                                      | 0.03 | 0.00 | -2.3 |
| NM_011261.1 | <i>Reln</i>     | reelin                                                                                   | 0.02 | 0.00 | -2.2 |
| NM_026097.1 | <i>Rffl</i>     | ring finger and FYVE like domain containing protein                                      | 0.00 | 0.00 | -2.3 |
| AK007253.1  | <i>Rhox13</i>   | reproductive homeobox 13                                                                 | 0.00 | 0.00 | -6.2 |
| NM_027897.2 | <i>Rhpn2</i>    | rhophilin, Rho GTPase binding protein 2 (Rhpn2)                                          | 0.01 | 0.00 | -3.0 |
| NM_025660.1 | <i>Ribc1</i>    | RIB43A domain with coiled-coils 1                                                        | 0.01 | 0.00 | -3.0 |



|             |                 |                                                                                              |      |      |      |
|-------------|-----------------|----------------------------------------------------------------------------------------------|------|------|------|
| AY497009.1  | <i>Rictor</i>   | RPTOR independent companion of MTOR, complex 2                                               | 0.00 | 0.00 | -2.4 |
| NM_023663.3 | <i>Ripk4</i>    | receptor-interacting serine-threonine kinase 4                                               | 0.01 | 0.00 | -3.1 |
| NM_023270.3 | <i>Rnf128</i>   | ring finger protein 128                                                                      | 0.03 | 0.00 | -2.4 |
| NM_013894.1 | <i>Rnf17</i>    | ring finger protein 17                                                                       | 0.01 | 0.00 | -6.1 |
| BB014105.2  | <i>Rnf17</i>    | ring finger protein 17                                                                       | 0.01 | 0.00 | -9.6 |
| NM_026594.1 | <i>Rpl39l</i>   | ribosomal protein L39-like                                                                   | 0.04 | 0.00 | -2.5 |
| NM_027491.1 | <i>Rragd</i>    | Ras-related GTP binding D                                                                    | 0.00 | 0.00 | -2.5 |
| BC023785.1  | <i>Rreb1</i>    | ras responsive element binding protein 1                                                     | 0.00 | 0.00 | -2.1 |
| NM_153457.6 | <i>Rtn1</i>     | reticulon 1 (Rtn1), transcript variant 1                                                     | 0.00 | 0.00 | -2.0 |
| NM_198620.1 | <i>Rundc3b</i>  | RUN domain containing 3B                                                                     | 0.04 | 0.00 | -3.4 |
| NM_025393.1 | <i>S100a14</i>  | S100 calcium binding protein A14                                                             | 0.01 | 0.00 | -2.5 |
| BC062937.1  | <i>Sall1</i>    | sal-like 1 (Drosophila)                                                                      | 0.00 | 0.00 | -3.0 |
| AK017633.1  | <i>Sall4</i>    | sal-like 4 (Drosophila)                                                                      | 0.01 | 0.00 | -3.1 |
| NM_026283.1 | <i>Samd8</i>    | sterile alpha motif domain containing 8                                                      | 0.03 | 0.00 | -2.2 |
| BG833093.1  | <i>Satb1</i>    | special AT-rich sequence binding protein 1                                                   | 0.03 | 0.00 | -2.7 |
| BG087102.2  | <i>Scml1</i>    | Vsex comb on midleg-like 1 (Drosophila)                                                      | 0.02 | 0.00 | -3.5 |
| NM_133194.2 | <i>Scml2</i>    | sex comb on midleg-like 2 (Drosophila)                                                       | 0.04 | 0.00 | -5.4 |
| NM_019460.1 | <i>Sfmbt1</i>   | Scm-like with four mbt domains 1                                                             | 0.02 | 0.00 | -2.0 |
| AK076687.1  | <i>Sfmbt2</i>   | Scm-like with four mbt domains 2                                                             | 0.01 | 0.00 | -2.9 |
| AV304616.2  | <i>Shh</i>      | sonic hedgehog                                                                               | 0.00 | 0.00 | -3.2 |
| NM_009170.2 | <i>Shh</i>      | sonic hedgehog                                                                               | 0.01 | 0.00 | -4.9 |
| NM_181590.2 | <i>Shq1</i>     | SHQ1 homolog ( <i>S. cerevisiae</i> )                                                        | 0.00 | 0.00 | -2.5 |
| AK012978.1  | <i>Shq1</i>     | SHQ1 homolog ( <i>S. cerevisiae</i> )                                                        | 0.00 | 0.00 | -2.5 |
| NM_009173.1 | <i>Siah1b</i>   | seven in absentia 1B                                                                         | 0.03 | 0.00 | -3.0 |
| NM_011380.1 | <i>Six2</i>     | sine oculis-related homeobox 2 homolog (Drosophila)                                          | 0.01 | 0.00 | -2.9 |
| NM_029084.1 | <i>Slamf8</i>   | SLAM family member 8                                                                         | 0.00 | 0.00 | -2.8 |
| NM_178386.2 | <i>Slc25a31</i> | solute carrier family 25 (mitochondrial carrier; adenine nucleotide translocator), member 31 | 0.01 | 0.00 | -3.8 |
| BY761173.1  | <i>Slc39a9</i>  | solute carrier family 39 (zinc transporter), member 9                                        | 0.00 | 0.00 | -2.1 |
| NM_007514.1 | <i>Slc7a2</i>   | solute carrier family 7 (cationic amino acid transporter, $\gamma^+$ system), member 2       | 0.00 | 0.00 | -3.0 |

|                |                |                                                                               |      |      |       |
|----------------|----------------|-------------------------------------------------------------------------------|------|------|-------|
| NM_080470.1    | <i>Smc1b</i>   | structural maintenance of chromosomes 1B                                      | 0.00 | 0.00 | -4.0  |
| NM_024230.1    | <i>Smtnl1</i>  | smoothelin-like 1                                                             | 0.00 | 0.00 | -2.7  |
| NM_013914.2    | <i>Snai3</i>   | snail homolog 3 (Drosophila)                                                  | 0.00 | 0.00 | -6.1  |
| NM_001001714.1 | <i>Sohlh1</i>  | spermatogenesis and oogenesis specific basic helix-loop-helix 1               | 0.00 | 0.00 | -7.0  |
| NM_028937.1    | <i>Sohlh2</i>  | spermatogenesis and oogenesis specific basic helix-loop-helix 2               | 0.01 | 0.00 | -3.6  |
| BC052024.1     | <i>Sox3</i>    | SRY-box containing gene 3                                                     | 0.00 | 0.00 | -13.3 |
| NM_030220.2    | <i>Sp2</i>     | Sp2 transcription factor                                                      | 0.00 | 0.00 | -4.1  |
| NM_022435.2    | <i>Sp5</i>     | trans-acting transcription factor 5                                           | 0.02 | 0.00 | -4.5  |
| NM_029299.1    | <i>Spata19</i> | spermatogenesis associated 19                                                 | 0.02 | 0.00 | -2.7  |
| NM_021343.1    | <i>Spata5</i>  | spermatogenesis associated 5                                                  | 0.03 | 0.00 | -3.3  |
| NM_030061.1    | <i>Spink12</i> | serine peptidase inhibitor, Kazal type 11                                     | 0.01 | 0.00 | -3.4  |
| NM_016907.2    | <i>Spint1</i>  | serine protease inhibitor, Kunitz type 1                                      | 0.02 | 0.00 | -2.6  |
| NM_138673.1    | <i>Stab2</i>   | stabilin 2                                                                    | 0.05 | 0.00 | -2.7  |
| U06924.1       | <i>Stat1</i>   | signal transducer and activator of transcription 1                            | 0.00 | 0.00 | -3.7  |
| NM_027399.1    | <i>Steap1</i>  | six transmembrane epithelial antigen of the prostate 1                        | 0.01 | 0.00 | -2.8  |
| NM_009292.1    | <i>Stra8</i>   | stimulated by retinoic acid gene 8                                            | 0.03 | 0.00 | -26.7 |
| NM_013873.3    | <i>Sult4a1</i> | sulfotransferase family 4A, member 1                                          | 0.00 | 0.00 | -3.0  |
| BC032960.1     | <i>Suv39h2</i> | suppressor of variegation 3-9 homolog 2 (Drosophila)                          | 0.02 | 0.00 | -2.6  |
| NM_011516.1    | <i>Sycp1</i>   | synaptonemal complex protein 1                                                | 0.00 | 0.00 | -5.8  |
| AK014411.1     | <i>Sycp2</i>   | synaptonemal complex protein 2                                                | 0.01 | 0.00 | -8.9  |
| NM_011517.1    | <i>Sycp3</i>   | synaptonemal complex protein 3                                                | 0.03 | 0.00 | -3.3  |
| NM_021482.1    | <i>Syngr4</i>  | synaptogyrin 4                                                                | 0.00 | 0.00 | -4.5  |
| AK129267.1     | <i>Synpo</i>   | synaptopodin                                                                  | 0.03 | 0.00 | -2.7  |
| AB026802.1     | <i>Syt9</i>    | synaptotagmin IX                                                              | 0.03 | 0.00 | -2.9  |
| NM_028958.2    | <i>Taf7l</i>   | TAF7-like RNA polymerase II, TATA box binding protein (TBP)-associated factor | 0.03 | 0.00 | -6.7  |
| NM_001001176.1 | <i>Taf9b</i>   | TAF9B RNA polymerase II, TATA box binding protein (TBP)-associated factor     | 0.01 | 0.00 | -2.6  |

|                |                 |                                                                   |      |      |       |
|----------------|-----------------|-------------------------------------------------------------------|------|------|-------|
| NM_013683.1    | <i>Tap1</i>     | transporter 1, ATP-binding cassette, sub-family B (MDR/TAP)       | 0.01 | 0.00 | -4.0  |
| NM_019636.1    | <i>Tbc1d1</i>   | TBC1 domain family, member 1                                      | 0.02 | 0.00 | -2.9  |
| NM_178254.2    | <i>Tcf15</i>    | transcription factor-like 5 (basic helix-loop-helix)              | 0.03 | 0.00 | -4.6  |
| NM_011560.2    | <i>Tcte3</i>    | t-complex-associated testis expressed 3                           | 0.00 | 0.00 | -2.2  |
| NM_001002238.1 | <i>Tdrd1</i>    | tudor domain containing 1                                         | 0.02 | 0.00 | -5.5  |
| AK012596.1     | <i>Tdrkh</i>    | tudor and KH domain containing protein                            | 0.03 | 0.00 | -3.0  |
| NM_019981.1    | <i>Tex101</i>   | testis expressed gene 101                                         | 0.00 | 0.00 | -3.9  |
| NM_031384.1    | <i>Tex11</i>    | testis expressed gene 11                                          | 0.02 | 0.00 | -15.4 |
| NM_025687.1    | <i>Tex12</i>    | testis expressed gene 12                                          | 0.00 | 0.00 | -5.9  |
| NM_031386.1    | <i>Tex14</i>    | testis expressed gene 14                                          | 0.02 | 0.00 | -3.3  |
| NM_031374.1    | <i>Tex15</i>    | testis expressed gene 15                                          | 0.02 | 0.00 | -3.7  |
| NM_031382.1    | <i>Tex16</i>    | testis expressed gene 16                                          | 0.01 | 0.00 | -3.2  |
| NM_031385.1    | <i>Tex18</i>    | testis expressed gene 18                                          | 0.02 | 0.00 | -5.4  |
| NM_028602.2    | <i>Tex19.1</i>  | testis expressed gene 19.1                                        | 0.00 | 0.00 | -3.0  |
| NM_009359.1    | <i>Tex9</i>     | testis expressed gene 9                                           | 0.01 | 0.00 | -2.1  |
| NM_011575.1    | <i>Tff3</i>     | trefoil factor 3, intestinal                                      | 0.04 | 0.00 | -2.0  |
| NM_011579.2    | <i>Tgtp1</i>    | T-cell specific GTPase 1                                          | 0.03 | 0.00 | -8.4  |
| NM_012033.2    | <i>Tinag</i>    | tubulointerstitial nephritis antigen                              | 0.01 | 0.00 | -3.1  |
| NM_028927.1    | <i>Tktl2</i>    | transketolase-like 2                                              | 0.00 | 0.00 | -7.5  |
| NM_009389.1    | <i>Tle3</i>     | transducin-like enhancer of split 3, homolog of Drosophila E(spl) | 0.01 | 0.00 | -2.5  |
| NM_025781.1    | <i>Tmem170</i>  | transmembrane protein 170                                         | 0.03 | 0.00 | -2.7  |
| BY731679.1     | <i>Tmem170b</i> | transmembrane protein 170B                                        | 0.00 | 0.00 | -4.3  |
| NM_177013.2    | <i>Tmem229a</i> | transmembrane protein 229A                                        | 0.00 | 0.00 | -4.0  |
| NM_001008973.1 | <i>Tmem232</i>  | transmembrane protein 232                                         | 0.00 | 0.00 | -2.0  |
| BB365838.2     | <i>Tnn</i>      | tenascin N                                                        | 0.03 | 0.00 | -2.5  |
| NM_198601.1    | <i>Trim52</i>   | tripartite motif-containing 52                                    | 0.00 | 0.00 | -4.0  |
| AV117999.1     | <i>Trim71</i>   | tripartite motif-containing 71                                    | 0.05 | 0.00 | -2.1  |
| BC049168.1     | <i>Trnp1</i>    | TMF1-regulated nuclear protein 1                                  | 0.00 | 0.00 | -3.6  |
| BC050805.1     | <i>Ttc25</i>    | tetratricopeptide repeat domain 25                                | 0.01 | 0.00 | -2.7  |
| AK007856.1     | <i>Ttc39b</i>   | tetratricopeptide repeat domain 39B                               | 0.00 | 0.00 | -2.2  |
| NM_009445.1    | <i>Ttk</i>      | Ttk protein kinase                                                | 0.00 | 0.00 | -2.0  |
| NM_009446.1    | <i>Tuba3</i>    | tubulin, alpha 3 (Tuba3)                                          | 0.00 | 0.00 | -4.5  |
| BB268360.2     | <i>Uba3</i>     | ubiquitin-like modifier activating enzyme 3                       | 0.04 | 0.00 | -2.1  |
| NM_172712.2    | <i>Uba6</i>     | ubiquitin-like modifier activating enzyme 6                       | 0.02 | 0.00 | -2.6  |

|             |                 |                                                                  |      |      |      |
|-------------|-----------------|------------------------------------------------------------------|------|------|------|
| AK078845.1  | <i>Ube2e3</i>   | ubiquitin-conjugating enzyme E2E 3, UBC4/5 homolog (yeast)       | 0.00 | 0.00 | -7.6 |
| NM_011670.1 | <i>Uchl1</i>    | ubiquitin carboxy-terminal hydrolase L1                          | 0.00 | 0.00 | -2.4 |
| NM_010633.3 | <i>Uhmk1</i>    | U2AF homology motif (UHM) kinase 1                               | 0.00 | 0.00 | -2.2 |
| NM_009477.1 | <i>Upp1</i>     | uridine phosphorylase 1 (Upp1)                                   | 0.00 | 0.00 | -3.4 |
| AK006739.1  | <i>Usp12</i>    | ubiquitin specific peptidase 12                                  | 0.03 | 0.00 | -3.8 |
| NM_011909.1 | <i>Usp18</i>    | ubiquitin specific peptidase 18                                  | 0.00 | 0.00 | -5.1 |
| NM_176972.2 | <i>Usp37</i>    | ubiquitin specific peptidase 37                                  | 0.00 | 0.00 | -2.2 |
| NM_152825.1 | <i>Usp45</i>    | ubiquitin specific peptidase 45                                  | 0.03 | 0.00 | -2.2 |
| NM_009482.1 | <i>Utf1</i>     | undifferentiated embryonic cell transcription factor 1           | 0.02 | 0.00 | -7.3 |
| BC048955.1  | <i>Utp20</i>    | UTP20, small subunit (SSU) processome component, homolog (yeast) | 0.02 | 0.00 | -2.0 |
| NM_173028.2 | <i>Vps13a</i>   | vacuolar protein sorting 13A (yeast)                             | 0.02 | 0.00 | -4.7 |
| NM_172840.2 | <i>Vwa2</i>     | von Willebrand factor A domain containing 2                      | 0.00 | 0.00 | -3.0 |
| NM_027963.1 | <i>Wdr16</i>    | WD repeat domain 16                                              | 0.00 | 0.00 | -2.1 |
| NM_080848.1 | <i>Wdr5</i>     | WD repeat domain 5                                               | 0.00 | 0.00 | -2.1 |
| AK129287.1  | <i>Whsc1</i>    | Wolf-Hirschhorn syndrome candidate 1 (human)                     | 0.01 | 0.00 | -2.2 |
| AK010881.1  | <i>Wipi2</i>    | WD repeat domain, phosphoinositide interacting 2                 | 0.04 | 0.00 | -2.5 |
| NM_011719.2 | <i>Wnt9b</i>    | wingless-type MMTV integration site 9B                           | 0.02 | 0.00 | -4.9 |
| NM_011726.1 | <i>Xlr3a</i>    | X-linked lymphocyte-regulated 3a (Xlr3a)                         | 0.00 | 0.00 | -2.5 |
| NM_011726.1 | <i>Xlr3a</i>    | X-linked lymphocyte-regulated 3A                                 | 0.00 | 0.00 | -8.8 |
| NM_031493.1 | <i>Xlr5c</i>    | X-linked lymphocyte-regulated 5C                                 | 0.02 | 0.00 | -6.2 |
| NM_026858.2 | <i>Xrcc6bp1</i> | XRCC6 binding protein 1                                          | 0.00 | 0.00 | -2.1 |
| NM_021394.1 | <i>Zbp1</i>     | Z-DNA binding protein 1                                          | 0.00 | 0.00 | -9.7 |
| AA882005.1  | <i>Zbtb16</i>   | zinc finger and BTB domain containing 16                         | 0.04 | 0.00 | -3.1 |
| BC051084.1  | <i>Zbtb42</i>   | zinc finger and BTB domain containing 42                         | 0.00 | 0.00 | -3.8 |
| BU756529.1  | <i>Zcchc2</i>   | zinc finger, CCHC domain containing 2                            | 0.01 | 0.00 | -2.1 |
| AK016727.1  | <i>Zfp597</i>   | zinc finger protein 597                                          | 0.03 | 0.00 | -2.7 |
| NM_028913.1 | <i>Zfp819</i>   | zinc finger protein 819                                          | 0.00 | 0.00 | -3.7 |
| BM240956.2  | <i>Zfp850</i>   | zinc finger protein 850                                          | 0.04 | 0.00 | -2.1 |
| NM_009571.1 | <i>Zfy2</i>     | zinc finger protein 2, Y linked (Zfy2)                           | 0.00 | 0.00 | -5.8 |
| AF401983.1  | <i>Zim2</i>     | zinc finger, imprinted 2                                         | 0.00 | 0.00 | -4.2 |

|             |                      |                                            |      |      |       |
|-------------|----------------------|--------------------------------------------|------|------|-------|
| NM_015785.1 | <i>Zpbp</i>          | zona pellucida binding protein             | 0.04 | 0.00 | -2.3  |
| NM_178375.2 | <i>Zswim3</i>        | zinc finger, SWIM domain containing 3      | 0.01 | 0.00 | -2.8  |
| BE946949.1  | <i>Zyg11b</i>        | zyg-II homolog B (C. elegans)              | 0.00 | 0.00 | -2.5  |
| CA479032.1  | <i>1190003J15Rik</i> | RIKEN cDNA 1190003J15 gene                 | 0.01 | 0.00 | -2.8  |
| AK005608.1  | <i>1700001L05Rik</i> | RIKEN cDNA 1700001L05 gene                 | 0.00 | 0.00 | -3.1  |
| NM_029372.1 | <i>1700011F14Rik</i> | RIKEN cDNA 1700011F14 gene                 | 0.00 | 0.00 | -2.8  |
| AK005953.1  | <i>1700013H16Rik</i> | RIKEN cDNA 1700013H16 gene                 | 0.00 | 0.00 | -9.2  |
| NM_198637.1 | <i>1700016K19Rik</i> | RIKEN cDNA 1700016K19 gene                 | 0.00 | 0.00 | -3.3  |
| NM_025493.2 | <i>1700018B24Rik</i> | enhancer of rudimentary homolog pseudogene | 0.00 | 0.00 | -5.4  |
| AK006179.1  | <i>1700020N01Rik</i> | RIKEN cDNA 1700020N01 gene                 | 0.00 | 0.00 | -2.5  |
| AK006257.1  | <i>1700023A16Rik</i> | RIKEN cDNA 1700023A16 gene                 | 0.00 | 0.00 | -3.2  |
| CN843262.1  | <i>1700024P04Rik</i> | RIKEN cDNA 1700024P04 gene                 | 0.02 | 0.00 | -2.4  |
| NM_025503.1 | <i>1700029P11Rik</i> | RIKEN cDNA 1700029P11 gene                 | 0.01 | 0.00 | -7.0  |
| AK006959.1  | <i>1700080O16Rik</i> | RIKEN cDNA 1700080O16 gene                 | 0.02 | 0.00 | -3.0  |
| BY707078.1  | <i>1700086P04Rik</i> | RIKEN cDNA 1700086P04 gene                 | 0.00 | 0.00 | -6.2  |
| AK007177.1  | <i>1700112H15Rik</i> | RIKEN cDNA 1700112H15 gene                 | 0.00 | 0.00 | -2.3  |
| AK007250.1  | <i>1700123I01Rik</i> | RIKEN cDNA 1700123I01 gene                 | 0.00 | 0.00 | -4.4  |
| AK019107.1  | <i>2410006F04Rik</i> | RIKEN cDNA 2410006F04 gene                 | 0.01 | 0.00 | -3.8  |
| NM_025572.1 | <i>2610528J11Rik</i> | RIKEN cDNA 2610528J11 gene                 | 0.05 | 0.00 | -2.5  |
| NM_027512.1 | <i>3830417A13Rik</i> | RIKEN cDNA 3830417A13 gene                 | 0.05 | 0.00 | -4.0  |
| NM_025723.1 | <i>4921515J06Rik</i> | RIKEN cDNA 4921515J06 gene                 | 0.00 | 0.00 | -10.8 |
| AK015678.1  | <i>4930502E18Rik</i> | RIKEN cDNA 4930502E18 gene                 | 0.00 | 0.00 | -2.1  |
| NM_026262.1 | <i>4930524B15Rik</i> | RIKEN cDNA 4930524B15 gene                 | 0.05 | 0.00 | -3.8  |
| BC024760.1  | <i>4930529M08Rik</i> | RIKEN cDNA 4930529M08 gene                 | 0.02 | 0.00 | -2.5  |
| NM_198607.1 | <i>4930572J05Rik</i> | RIKEN cDNA 4930572J05 gene                 | 0.01 | 0.00 | -2.5  |
| AK016695.1  | <i>4933406J08Rik</i> | RIKEN cDNA 4933406J08 gene                 | 0.00 | 0.00 | -3.6  |

|                |                      |                             |      |      |      |
|----------------|----------------------|-----------------------------|------|------|------|
| AK048125.1     | <i>4933411K20Rik</i> | RIKEN cDNA 4933411K20 gene  | 0.00 | 0.00 | -4.1 |
| AV281902.2     | <i>4933427D06Rik</i> | RIKEN cDNA 4933427D06 gene  | 0.00 | 0.00 | -7.1 |
| NM_175017.2    | <i>4933427D06Rik</i> | RIKEN cDNA 4933427D06 gene  | 0.01 | 0.00 | -9.7 |
| AV347067.2     | <i>6430590A07Rik</i> | RIKEN cDNA 6430590A07 gene  | 0.00 | 0.00 | -2.3 |
| AK033245.1     | <i>8030474K03Rik</i> | RIKEN cDNA 8030474K03 gene  | 0.00 | 0.00 | -4.0 |
| AK020619.1     | <i>9530062K07Rik</i> | RIKEN cDNA 9530062K07 gene  | 0.04 | 0.00 | -4.6 |
| BC042745.1     | <i>A330069E16Rik</i> | RIKEN cDNA A330069E16 gene  | 0.02 | 0.00 | -2.3 |
| NM_178796.3    | <i>A530064D06Rik</i> | RIKEN cDNA A530064D06 gene  | 0.04 | 0.00 | -3.3 |
| NM_001004174.1 | <i>AA467197</i>      | expressed sequence AA467197 | 0.03 | 0.00 | -3.0 |
| BC020182.1     |                      |                             | 0.00 | 0.00 | -2.0 |
| NM_134063.2    |                      |                             | 0.00 | 0.00 | -2.0 |
| BC036332.1     |                      |                             | 0.03 | 0.00 | -2.1 |
| AK015922.1     |                      |                             | 0.05 | 0.00 | -2.1 |
| BB554612.2     |                      |                             | 0.02 | 0.00 | -2.1 |
| AK045740.1     |                      |                             | 0.01 | 0.00 | -2.1 |
| BY703358.1     |                      |                             | 0.01 | 0.00 | -2.1 |
| CO806983.1     |                      |                             | 0.02 | 0.00 | -2.2 |
| BY742236.1     |                      |                             | 0.01 | 0.00 | -2.2 |
| AI323998.1     |                      |                             | 0.00 | 0.00 | -2.2 |
| NM_201364.1    |                      |                             | 0.05 | 0.00 | -2.2 |
| BB559411.2     |                      |                             | 0.04 | 0.00 | -2.2 |
| CA464433.1     |                      |                             | 0.04 | 0.00 | -2.2 |
| BB268253.1     |                      |                             | 0.03 | 0.00 | -2.3 |
| AK082203.1     |                      |                             | 0.01 | 0.00 | -2.3 |
| BY368931.1     |                      |                             | 0.00 | 0.00 | -2.3 |
| BY710919.1     |                      |                             | 0.01 | 0.00 | -2.3 |
| AK079871.1     |                      |                             | 0.03 | 0.00 | -2.3 |
| BQ550570.1     |                      |                             | 0.04 | 0.00 | -2.6 |
| BE957117.1     |                      |                             | 0.00 | 0.00 | -2.6 |
| AI507010.1     |                      |                             | 0.00 | 0.00 | -2.6 |
| AK076976.1     |                      |                             | 0.00 | 0.00 | -2.7 |
| BB729271.1     |                      |                             | 0.02 | 0.00 | -2.7 |
| NM_023781.3    |                      |                             | 0.01 | 0.00 | -2.7 |
| AV254043.2     |                      |                             | 0.02 | 0.00 | -2.7 |
| BB520952.2     |                      |                             | 0.02 | 0.00 | -2.8 |
| NM_170757.1    |                      |                             | 0.02 | 0.00 | -2.8 |
| BG082668.2     |                      |                             | 0.00 | 0.00 | -2.9 |
| BB858483.1     |                      |                             | 0.00 | 0.00 | -3.0 |
| AK015184.1     |                      |                             | 0.04 | 0.00 | -3.1 |

|             |  |  |      |      |       |
|-------------|--|--|------|------|-------|
| AK015606.1  |  |  | 0.00 | 0.00 | -3.1  |
| BB048290.1  |  |  | 0.02 | 0.00 | -3.1  |
| BE944454.1  |  |  | 0.02 | 0.00 | -3.3  |
| AI451225.1  |  |  | 0.04 | 0.00 | -3.4  |
| AK015130.1  |  |  | 0.00 | 0.00 | -3.4  |
| NM_009109.1 |  |  | 0.01 | 0.00 | -3.4  |
| BQ174097.1  |  |  | 0.00 | 0.00 | -3.6  |
| AI118499.1  |  |  | 0.03 | 0.00 | -3.7  |
| BX630487.1  |  |  | 0.00 | 0.00 | -3.7  |
| BB185781.1  |  |  | 0.00 | 0.00 | -4.5  |
| BG075960.2  |  |  | 0.04 | 0.00 | -4.6  |
| BF018919.1  |  |  | 0.02 | 0.00 | -4.7  |
| AW061221.1  |  |  | 0.00 | 0.00 | -4.8  |
| NM_023386.3 |  |  | 0.00 | 0.00 | -4.9  |
| BQ257921.1  |  |  | 0.03 | 0.00 | -5.7  |
| BG083749.2  |  |  | 0.00 | 0.00 | -6.3  |
| BY706965.1  |  |  | 0.00 | 0.00 | -6.4  |
| AI591895.1  |  |  | 0.02 | 0.00 | -14.4 |
