# Supplementary material for: Sertoli-cell-specific knockout of connexin 43 leads to multiple alterations in testicular gene expression in prepubertal mice
Source: PubMed Central journal article supplement — Dis Model Mech. 2012 Jun 14;5(6):895–913. doi: 10.1242/dmm.008649 (PMC3484871; doi:10.1242/dmm.008649), 2012-06-14
Supplement: supp_008649_DMM008649FigS2.pdf [file supp_008649_DMM008649FigS2.pdf]

**Supplemental Table 2a**

| <b>Annotation Cluster 1</b>               | <b>Enrichment Score</b> | <b>2.09</b>                                   |
|-------------------------------------------|-------------------------|-----------------------------------------------|
| <b>Term</b>                               | <b>p-value</b>          | <b>Genes</b>                                  |
| GO0006935~chemotaxis                      | 0.002                   | ROBO1, S100A9, CCL9, CCL17, CCL6              |
| GO0042330~taxis                           | 0.002                   | ROBO1, S100A9, CCL9, CCL17, CCL6              |
| GO0007610~behavior                        | 0.010                   | ROBO1, S100A9, CCL9, ZIC1, APBB1, CCL17, CCL6 |
| GO0007626~locomotory behavior             | 0.024                   | ROBO1, S100A9, CCL9, CCL17, CCL6              |
| GO0006955~immune response                 | 0.063                   | THEMIS, CCL9, CFI, LTB, CCL17, CCL6           |
|                                           |                         |                                               |
| <b>Annotation Cluster 2</b>               | <b>Enrichment Score</b> | <b>1.99</b>                                   |
| <b>Term</b>                               | <b>p-value</b>          | <b>Genes</b>                                  |
| GO0016477~cell migration                  | 0.005                   | VAV3, TNS1, MDGA1, S100A9, ESR2, APBB1        |
| GO0006928~cell motion                     | 0.006                   | VAV3, TNS1, ROBO1, MDGA1, S100A9, ESR2, APBB1 |
| GO0048870~cell motility                   | 0.009                   | VAV3, TNS1, MDGA1, S100A9, ESR2, APBB1        |
| GO0051674~localization of cell            | 0.009                   | VAV3, TNS1, MDGA1, S100A9, ESR2, APBB1        |
| GO0001764~neuron migration                | 0.041                   | MDGA1, ESR2, APBB1                            |
|                                           |                         |                                               |
| <b>Annotation Cluster 3</b>               | <b>Enrichment Score</b> | <b>0.94</b>                                   |
| <b>Term</b>                               | <b>p-value</b>          | <b>Genes</b>                                  |
| GO0030029~actin filament-based process    | 0.046                   | ACTA1, S100A9, CNN1, APBB1                    |
| GO0030036~actin cytoskeleton organization | 0.174                   | ACTA1, S100A9, CNN1                           |
| GO0007010~cytoskeleton organization       | 0.186                   | ACTA1, S100A9, CNN1, TACC2                    |

**Supplemental Table 2b**

| <b>Annotation Cluster 1</b>                              | <b>Enrichment Score</b> | <b>12.61</b>                                                                                                                                                                                                                                               |
|----------------------------------------------------------|-------------------------|------------------------------------------------------------------------------------------------------------------------------------------------------------------------------------------------------------------------------------------------------------|
| <b>GO Term</b>                                           | <b>p-value</b>          | <b>Genes</b>                                                                                                                                                                                                                                               |
| 0048232~male gamete generation                           | 0.000                   | RAD51C, RNF17, SOX3, ADAD1, MAEL, GGT1, ZBTB16, SOHLH1, SOHLH2, TAF7L, STRA8, DDX25, OVOL1, PIWIL2, DAZL, SPATA5, TDRD1, CCNB1IP1, MSH4, TLE3, MORC1, HMGA1, REC8, CLGN, TEX15, SYCP3, TCFL5, D1PAS1, SPATA19, DMC1                                        |
| 0007283~spermato-genesis                                 | 0.000                   | RAD51C, RNF17, SOX3, ADAD1, MAEL, GGT1, ZBTB16, SOHLH1, SOHLH2, TAF7L, STRA8, DDX25, OVOL1, PIWIL2, DAZL, SPATA5, TDRD1, CCNB1IP1, MSH4, TLE3, MORC1, HMGA1, REC8, CLGN, TEX15, SYCP3, TCFL5, D1PAS1, SPATA19, DMC1                                        |
| 0019953~sexual reproduction                              | 0.000                   | RAD51C, RNF17, SOX3, ADAD1, FIGLA, MAEL, ASZ1, GGT1, ZBTB16, SYCP2, SOHLH1, SOHLH2, TAF7L, ZPBP, STRA8, DDX25, OVOL1, PIWIL2, DAZL, DND1, SPATA5, TDRD1, CCNB1IP1, MSH4, TLE3, MORC1, HMGA1, REC8, TEX15, CLGN, TCFL5, SYCP3, D1PAS1, SPATA19, DMC1, TEX11 |
| 0007276~gamete generation                                | 0.000                   | RAD51C, RNF17, SOX3, ADAD1, FIGLA, MAEL, ASZ1, GGT1, ZBTB16, SOHLH1, SOHLH2, TAF7L, STRA8, DDX25, OVOL1, PIWIL2, DAZL, DND1, SPATA5, TDRD1, CCNB1IP1, MSH4, TLE3, MORC1, HMGA1, REC8, CLGN, TEX15, TCFL5, SYCP3, D1PAS1, SPATA19, DMC1                     |
| 0032504~multicellular organism reproduction              | 0.000                   | RAD51C, RNF17, SOX3, ADAD1, FIGLA, MAEL, ASZ1, GGT1, ZBTB16, SOHLH1, SOHLH2, TAF7L, STRA8, DDX25, OVOL1, PIWIL2, DAZL, CHRNA7, DND1, SPATA5, TDRD1, CCNB1IP1, FOXL2, MSH4, TLE3, MORC1, HMGA1, REC8, CLGN, TEX15, TCFL5, SYCP3, D1PAS1, SPATA19, DMC1      |
| 0048609~reproductive process in a multicellular organism | 0.000                   | RAD51C, RNF17, SOX3, ADAD1, FIGLA, MAEL, ASZ1, GGT1, ZBTB16, SOHLH1, SOHLH2, TAF7L, STRA8, DDX25, OVOL1, PIWIL2, DAZL, CHRNA7, DND1, SPATA5, TDRD1, CCNB1IP1, FOXL2, MSH4, TLE3, MORC1, HMGA1, REC8, CLGN, TEX15, TCFL5, SYCP3, D1PAS1, SPATA19, DMC1      |
|                                                          |                         |                                                                                                                                                                                                                                                            |
| <b>Annotation Cluster 2</b>                              | <b>Enrichment Score</b> | <b>10.53</b>                                                                                                                                                                                                                                               |
| <b>GO Term</b>                                           | <b>p-value</b>          | <b>Genes</b>                                                                                                                                                                                                                                               |
| 0007127~meiosis I                                        | 0.000                   | CCNB1IP1, RAD51C, MSH4, MAEL, CPEB1, SYCP1, RAD51, REC8, TEX15, STRA8, SYCP3, OVOL1, PIWIL2, DMC1, TEX11                                                                                                                                                   |

|                                                  |                         |                                                                                                                                                                                                                             |
|--------------------------------------------------|-------------------------|-----------------------------------------------------------------------------------------------------------------------------------------------------------------------------------------------------------------------------|
| 0007126~meiosis                                  | 0.000                   | CCNB1IP1, RAD51C, MSH4, MAEL, CPEB1, SYCP2, SYCP1, RAD51, SUV39H2, REC8, CLGN, TEX15, STRA8, SYCP3, OVOL1, PIWIL2, DMC1, TDRD1, TEX11, SMC1B                                                                                |
| 0051327~M phase of meiotic cell cycle            | 0.000                   | CCNB1IP1, RAD51C, MSH4, MAEL, CPEB1, SYCP2, SYCP1, RAD51, SUV39H2, REC8, CLGN, TEX15, STRA8, SYCP3, OVOL1, PIWIL2, DMC1, TDRD1, TEX11, SMC1B                                                                                |
| 0051321~meiotic cell cycle                       | 0.000                   | CCNB1IP1, RAD51C, MSH4, MAEL, CPEB1, SYCP2, SYCP1, RAD51, SUV39H2, REC8, CLGN, TEX15, STRA8, SYCP3, OVOL1, PIWIL2, DMC1, TDRD1, TEX11, SMC1B                                                                                |
| 0000279~M phase                                  | 0.000                   | RAD51C, NEK3, MAEL, CPEB1, SYCP2, SYCP1, STRA8, OVOL1, PIWIL2, TDRD1, HELLS, CCNB1IP1, MSH4, RAD51, SUV39H2, FSD1, REC8, CLGN, TEX15, SYCP3, HORMAD1, HORMAD2, DMC1, SMC1B, TEX11                                           |
| 0022403~cell cycle phase                         | 0.000                   | RAD51C, NEK3, MAEL, CPEB1, SYCP2, SYCP1, STRA8, OVOL1, PIWIL2, TDRD1, HELLS, CCNB1IP1, MSH4, RAD51, SUV39H2, FSD1, REC8, CLGN, TEX15, SYCP3, HORMAD1, HORMAD2, DMC1, SMC1B, TEX11                                           |
| 0022402~cell cycle process                       | 0.000                   | RAD51C, NEK3, MAEL, CPEB1, SYCP2, SYCP1, UHMK1, CDKN2A, STRA8, OVOL1, PIWIL2, TDRD1, HELLS, CCNB1IP1, MSH4, RAD51, SUV39H2, FSD1, REC8, CLGN, TEX15, SYCP3, HORMAD1, HORMAD2, DMC1, TEX11, SMC1B                            |
| 0007049~cell cycle                               | 0.000                   | RAD51C, NEK3, MAEL, CPEB1, SYCP2, SYCP1, UHMK1, CDKN2A, STRA8, FANCI, OVOL1, PIWIL2, TDRD1, HELLS, CCNB1IP1, TRNP1, MSH4, SUV39H2, RAD51, FSD1, REC8, TEX15, CLGN, SYCP3, UBA3, HORMAD1, RBM38, HORMAD2, DMC1, TEX11, SMC1B |
|                                                  |                         |                                                                                                                                                                                                                             |
| <b>Annotation Cluster 3</b>                      | <b>Enrichment Score</b> | <b>2.73</b>                                                                                                                                                                                                                 |
| GO Term                                          | p-value                 | Genes                                                                                                                                                                                                                       |
| 0007062~sister chromatid cohesion                | 0.001                   | RAD51C, SYCP3, STRA8, SMC1B                                                                                                                                                                                                 |
| 0045132~meiotic chromosome segregation           | 0.001                   | RAD51C, SYCP3, STRA8, TEX11                                                                                                                                                                                                 |
| 0007066~female meiosis sister chromatid cohesion | 0.002                   | RAD51C, SYCP3, STRA8                                                                                                                                                                                                        |
| 0007143~female meiosis                           | 0.003                   | RAD51C, SYCP3, STRA8, SYCP2                                                                                                                                                                                                 |
| 0051177~meiotic sister chromatid cohesion        | 0.004                   | RAD51C, SYCP3, STRA8                                                                                                                                                                                                        |

|                                                                                                      |                         |                                                                                                                                                                         |
|------------------------------------------------------------------------------------------------------|-------------------------|-------------------------------------------------------------------------------------------------------------------------------------------------------------------------|
|                                                                                                      |                         |                                                                                                                                                                         |
| <b>Annotation Cluster 4</b>                                                                          | <b>Enrichment Score</b> | <b>2.33</b>                                                                                                                                                             |
| <b>GO Term</b>                                                                                       | <b>p-value</b>          | <b>Genes</b>                                                                                                                                                            |
| 0010557~positive regulation of macromolecule biosynthetic process                                    | 0.001                   | FOXL2, UTF1, HNF1B, HTATIP2, GLIS1, SIX2, EHF, GRHL3, LIN28A, ISL1, HMGA1, SHH, SALL4, OVOL2, KRT17, IRF6, PAX8, POU2F2, POU3F3, PIWIL2, DAZL, EAF2, NFIB               |
| 0031328~positive regulation of cellular biosynthetic process                                         | 0.002                   | FOXL2, UTF1, HNF1B, HTATIP2, GLIS1, SIX2, EHF, GRHL3, LIN28A, ISL1, HMGA1, SHH, SALL4, OVOL2, KRT17, IRF6, PAX8, POU2F2, POU3F3, PIWIL2, DAZL, EAF2, NFIB               |
| 0009891~positive regulation of biosynthetic process                                                  | 0.002                   | FOXL2, UTF1, HNF1B, HTATIP2, GLIS1, SIX2, EHF, GRHL3, LIN28A, ISL1, HMGA1, SHH, SALL4, OVOL2, KRT17, IRF6, PAX8, POU2F2, POU3F3, PIWIL2, DAZL, EAF2, NFIB               |
| 0010604~positive regulation of macromolecule metabolic process                                       | 0.002                   | FGF8, HNF1B, HTATIP2, GLIS1, EHF, LIN28A, SHH, OVOL2, POU2F2, PAX8, POU3F3, PIWIL2, DAZL, UTF1, FOXL2, SIX2, GRHL3, RICTOR, ISL1, HMGA1, SALL4, KRT17, IRF6, EAF2, NFIB |
| 0010628~positive regulation of gene expression                                                       | 0.005                   | FOXL2, UTF1, HNF1B, FGF8, HTATIP2, GLIS1, SIX2, EHF, GRHL3, ISL1, HMGA1, SHH, SALL4, OVOL2, IRF6, PAX8, POU2F2, POU3F3, EAF2, NFIB                                      |
| 0045941~positive regulation of transcription                                                         | 0.008                   | FOXL2, UTF1, HNF1B, HTATIP2, GLIS1, SIX2, EHF, GRHL3, ISL1, HMGA1, SHH, SALL4, OVOL2, IRF6, PAX8, POU2F2, POU3F3, EAF2, NFIB                                            |
| 0045935~positive regulation of nucleobase, nucleoside, nucleotide and nucleic acid metabolic process | 0.017                   | FOXL2, UTF1, HNF1B, HTATIP2, GLIS1, SIX2, EHF, GRHL3, ISL1, HMGA1, SHH, SALL4, OVOL2, IRF6, PAX8, POU2F2, POU3F3, EAF2, NFIB                                            |
| 0051173~positive regulation of nitrogen compound metabolic process                                   | 0.022                   | FOXL2, UTF1, HNF1B, HTATIP2, GLIS1, SIX2, EHF, GRHL3, ISL1, HMGA1, SHH, SALL4, OVOL2, IRF6, PAX8, POU2F2, POU3F3, EAF2, NFIB                                            |
|                                                                                                      |                         |                                                                                                                                                                         |
| <b>Annotation Cluster 5</b>                                                                          | <b>Enrichment Score</b> | <b>2.21</b>                                                                                                                                                             |
| <b>GO Term</b>                                                                                       | <b>p-value</b>          | <b>Genes</b>                                                                                                                                                            |
| 0022602~ovulation cycle process                                                                      | 0.003                   | FOXL2, STRA8, MSH4, CHRNA7, DMC1, SOHLH1                                                                                                                                |
| 0042698~ovulation cycle                                                                              | 0.003                   | FOXL2, STRA8, MSH4, CHRNA7, DMC1, SOHLH1                                                                                                                                |
| 0001541~ovarian follicle development                                                                 | 0.004                   | FOXL2, STRA8, MSH4, DMC1, SOHLH1                                                                                                                                        |
| 0048511~rhythmic process                                                                             | 0.049                   | FOXL2, STRA8, MSH4, CHRNA7, DMC1, SOHLH1                                                                                                                                |
|                                                                                                      |                         |                                                                                                                                                                         |

| <b>Annotation Cluster 6</b>                                  | <b>Enrichment Score</b> | <b>2.13</b>                                                                                                                                                              |
|--------------------------------------------------------------|-------------------------|--------------------------------------------------------------------------------------------------------------------------------------------------------------------------|
| <b>GO Term</b>                                               | <b>p-value</b>          | <b>Genes</b>                                                                                                                                                             |
| 0001541~ovarian follicle development                         | 0.004                   | FOXL2, STRA8, MSH4, DMC1, SOHLH1                                                                                                                                         |
| 0008585~female gonad development                             | 0.004                   | FOXL2, STRA8, MSH4, LHX8, DMC1, SOHLH1                                                                                                                                   |
| 0046545~development of primary female sexual characteristics | 0.006                   | FOXL2, STRA8, MSH4, LHX8, DMC1, SOHLH1                                                                                                                                   |
| 0008406~gonad development                                    | 0.009                   | FOXL2, STRA8, MSH4, LHX8, DMC1, SOHLH1, TEX11                                                                                                                            |
| 0046660~female sex differentiation                           | 0.010                   | FOXL2, STRA8, MSH4, LHX8, DMC1, SOHLH1                                                                                                                                   |
| 0048608~reproductive structure development                   | 0.017                   | FOXL2, STRA8, MSH4, LHX8, DMC1, SOHLH1, SHH, TEX11                                                                                                                       |
|                                                              |                         |                                                                                                                                                                          |
| <b>Annotation Cluster 7</b>                                  | <b>Enrichment Score</b> | <b>1.99</b>                                                                                                                                                              |
| <b>GO Term</b>                                               | <b>p-value</b>          | <b>Genes</b>                                                                                                                                                             |
| 0021795~cerebral cortex cell migration                       | 0.004                   | DAB1, POU3F3, LHX6, RELN                                                                                                                                                 |
| 0022029~telencephalon cell migration                         | 0.005                   | DAB1, POU3F3, LHX6, RELN                                                                                                                                                 |
| 0021885~forebrain cell migration                             | 0.006                   | DAB1, POU3F3, LHX6, RELN                                                                                                                                                 |
| 0021799~cerebral cortex radially oriented cell migration     | 0.011                   | DAB1, POU3F3, LHX6                                                                                                                                                       |
| 0021543~pallium development                                  | 0.022                   | FGF8, DAB1, POU3F3, LHX6, RELN                                                                                                                                           |
| 0021987~cerebral cortex development                          | 0.039                   | DAB1, POU3F3, LHX6, RELN                                                                                                                                                 |
|                                                              |                         |                                                                                                                                                                          |
| <b>Annotation Cluster 8</b>                                  | <b>Enrichment Score</b> | <b>1.96</b>                                                                                                                                                              |
| <b>GO Term</b>                                               | <b>p-value</b>          | <b>Genes</b>                                                                                                                                                             |
| 0044265~cellular macromolecule catabolic process             | 0.003                   | FOXL2, UCHL1, UBA6, HERC3, RFFL, OAS2, DNAHC12, LIN28A, PSMA8, PSMB9, ATE1, ZYG11B, ASB9, UBE2E3, ARIH1, USP18, STRA8, SIAH1B, RNF128, UBA3, USP12, USP37, FBXO15, USP45 |
| 0009057~macromolecule catabolic process                      | 0.007                   | FOXL2, UCHL1, UBA6, HERC3, RFFL, OAS2, DNAHC12, LIN28A, PSMA8, PSMB9, ATE1, ZYG11B, ASB9, UBE2E3, ARIH1, USP18, STRA8, SIAH1B, RNF128, UBA3, USP12, USP37, FBXO15, USP45 |

|                                                                    |                         |                                                                                                                                                               |
|--------------------------------------------------------------------|-------------------------|---------------------------------------------------------------------------------------------------------------------------------------------------------------|
| 0051603~proteolysis involved in cellular protein catabolic process | 0.013                   | UCHL1, UBA6, HERC3, RFFL, DNAHC12, PSMA8, PSMB9, ATE1, ZYG11B, ASB9, UBE2E3, ARIH1, USP18, SIAH1B, RNF128, UBA3, USP12, USP37, FBXO15, USP45                  |
| 0044257~cellular protein catabolic process                         | 0.014                   | UCHL1, UBA6, HERC3, RFFL, DNAHC12, PSMA8, PSMB9, ATE1, ZYG11B, ASB9, UBE2E3, ARIH1, USP18, SIAH1B, RNF128, UBA3, USP12, USP37, FBXO15, USP45                  |
| 0043632~modification-dependent macromolecule catabolic process     | 0.016                   | UCHL1, UBA6, HERC3, RFFL, DNAHC12, PSMA8, ATE1, ZYG11B, ASB9, UBE2E3, ARIH1, USP18, SIAH1B, RNF128, UBA3, USP12, USP37, FBXO15, USP45                         |
| 0019941~modification-dependent protein catabolic process           | 0.016                   | UCHL1, UBA6, HERC3, RFFL, DNAHC12, PSMA8, ATE1, ZYG11B, ASB9, UBE2E3, ARIH1, USP18, SIAH1B, RNF128, UBA3, USP12, USP37, FBXO15, USP45                         |
| 0030163~protein catabolic process                                  | 0.019                   | UCHL1, UBA6, HERC3, RFFL, DNAHC12, PSMA8, PSMB9, ATE1, ZYG11B, ASB9, UBE2E3, ARIH1, USP18, SIAH1B, RNF128, UBA3, USP12, USP37, FBXO15, USP45                  |
|                                                                    |                         |                                                                                                                                                               |
| <b>Annotation Cluster 9</b>                                        | <b>Enrichment Score</b> | <b>1.91</b>                                                                                                                                                   |
| <b>GO Term</b>                                                     | <b>p-value</b>          | <b>Genes</b>                                                                                                                                                  |
| 0010605~negative regulation of macromolecule metabolic process     | 0.002                   | SATB1, GTPBP4, SPINK12, HMX1, GLIS1, GABPA, MAEL, CBX2, ZBTB16, LIN28A, SHH, ZBTB42, SALL4, CDKN2A, OVOL2, STRA8, RNF128, OVOL1, PIWIL2, POU3F3, TDRD1, HELLS |
| 0010629~negative regulation of gene expression                     | 0.010                   | SATB1, HMX1, GLIS1, GABPA, MAEL, CBX2, ZBTB16, LIN28A, SHH, ZBTB42, SALL4, OVOL2, OVOL1, POU3F3, PIWIL2, TDRD1, HELLS                                         |
| 0045892~negative regulation of transcription, DNA-dependent        | 0.010                   | SATB1, HMX1, GLIS1, GABPA, MAEL, CBX2, ZBTB16, SHH, ZBTB42, SALL4, OVOL2, OVOL1, POU3F3, HELLS                                                                |
| 0051253~negative regulation of RNA metabolic process               | 0.011                   | SATB1, HMX1, GLIS1, GABPA, MAEL, CBX2, ZBTB16, SHH, ZBTB42, SALL4, OVOL2, OVOL1, POU3F3, HELLS                                                                |
| 0010558~negative regulation of macromolecule biosynthetic process  | 0.012                   | SATB1, GTPBP4, HMX1, GLIS1, GABPA, MAEL, CBX2, ZBTB16, SHH, ZBTB42, SALL4, OVOL2, STRA8, RNF128, OVOL1, POU3F3, HELLS                                         |
| 0031327~negative regulation of cellular biosynthetic process       | 0.015                   | SATB1, GTPBP4, HMX1, GLIS1, GABPA, MAEL, CBX2, ZBTB16, SHH, ZBTB42, SALL4, OVOL2, STRA8, RNF128, OVOL1, POU3F3, HELLS                                         |

|                                                                                                      |                         |                                                                                                                       |
|------------------------------------------------------------------------------------------------------|-------------------------|-----------------------------------------------------------------------------------------------------------------------|
| 0045934~negative regulation of nucleobase, nucleoside, nucleotide and nucleic acid metabolic process | 0.016                   | SATB1, GTPBP4, HMX1, GLIS1, GABPA, MAEL, CBX2, ZBTB16, SHH, ZBTB42, SALL4, OVOL2, STRA8, OVOL1, POU3F3, HELLS         |
| 0009890~negative regulation of biosynthetic process                                                  | 0.016                   | SATB1, GTPBP4, HMX1, GLIS1, GABPA, MAEL, CBX2, ZBTB16, SHH, ZBTB42, SALL4, OVOL2, STRA8, RNF128, OVOL1, POU3F3, HELLS |
| 0051172~negative regulation of nitrogen compound metabolic process                                   | 0.017                   | SATB1, GTPBP4, HMX1, GLIS1, GABPA, MAEL, CBX2, ZBTB16, SHH, ZBTB42, SALL4, OVOL2, STRA8, OVOL1, POU3F3, HELLS         |
| 0000122~negative regulation of transcription from RNA polymerase II promoter                         | 0.020                   | SATB1, HMX1, SALL4, GABPA, GLIS1, OVOL1, MAEL, POU3F3, CBX2, SHH, ZBTB42                                              |
| 0016481~negative regulation of transcription                                                         | 0.041                   | SATB1, HMX1, GLIS1, GABPA, MAEL, CBX2, ZBTB16, SHH, ZBTB42, SALL4, OVOL2, OVOL1, POU3F3, HELLS                        |
|                                                                                                      |                         |                                                                                                                       |
| <b>Annotation Cluster 10</b>                                                                         | <b>Enrichment Score</b> | <b>1.90</b>                                                                                                           |
| <b>GO Term</b>                                                                                       | <b>p-value</b>          | <b>Genes</b>                                                                                                          |
| 0030539~male genitalia development                                                                   | 0.003                   | FGF8, TEX15, SYCP2, SHH                                                                                               |
| 0046546~development of primary male sexual characteristics                                           | 0.022                   | FGF8, TEX15, SYCP2, SHH, TEX11                                                                                        |
| 0046661~male sex differentiation                                                                     | 0.028                   | FGF8, TEX15, SYCP2, SHH, TEX11                                                                                        |
|                                                                                                      |                         |                                                                                                                       |
| <b>Annotation Cluster 11</b>                                                                         | <b>Enrichment Score</b> | <b>1.86</b>                                                                                                           |
| <b>GO Term</b>                                                                                       | <b>p-value</b>          | <b>Genes</b>                                                                                                          |
| 0034587~piRNA metabolic process                                                                      | 0.004                   | MAEL, PIWIL2, TDRD1                                                                                                   |
| 0043046~DNA methylation during gametogenesis                                                         | 0.011                   | MAEL, PIWIL2, TDRD1                                                                                                   |
| 0006306~DNA methylation                                                                              | 0.011                   | MAEL, PIWIL2, TDRD1, HELLS                                                                                            |
| 0006305~DNA alkylation                                                                               | 0.011                   | MAEL, PIWIL2, TDRD1, HELLS                                                                                            |
| 0006304~DNA modification                                                                             | 0.012                   | MAEL, PIWIL2, TDRD1, HELLS                                                                                            |
| 0016458~gene silencing                                                                               | 0.028                   | MAEL, PIWIL2, LIN28A, TDRD1, HELLS                                                                                    |

|                                                                   |                         |                                                                                                                 |
|-------------------------------------------------------------------|-------------------------|-----------------------------------------------------------------------------------------------------------------|
| 0040029~regulation of gene expression, epigenetic                 | 0.054                   | MAEL, PIWIL2, LIN28A, TDRD1, HELLS                                                                              |
| <b>Annotation Cluster 12</b>                                      | <b>Enrichment Score</b> | <b>1.74</b>                                                                                                     |
| <b>GO Term</b>                                                    | <b>p-value</b>          | <b>Genes</b>                                                                                                    |
| 0001701~in utero embryonic development                            | 0.009                   | CCNB1IP1, HNF1B, KIF3A, GABPA, SPINT1, CX43, CDH1, ASCL2, FOXF1A, SALL4, OVOL2, COL4A3BP, KRT8                  |
| 0043009~chordate embryonic development                            | 0.025                   | CCNB1IP1, FGF8, HNF1B, KIF3A, GABPA, CX43, SPINT1, SIX2, CDH1, SHH, ASCL2, FOXF1A, SALL4, OVOL2, COL4A3BP, KRT8 |
| 0009792~embryonic development ending in birth or egg hatching     | 0.027                   | CCNB1IP1, FGF8, HNF1B, KIF3A, GABPA, CX43, SPINT1, SIX2, CDH1, SHH, ASCL2, FOXF1A, SALL4, OVOL2, COL4A3BP, KRT8 |
| <b>Annotation Cluster 13</b>                                      | <b>Enrichment Score</b> | <b>1.69</b>                                                                                                     |
| <b>GO Term</b>                                                    | <b>p-value</b>          | <b>Genes</b>                                                                                                    |
| 0051674~localization of cell                                      | 0.013                   | ASZ1, CX43, ISL1, SHH, TAF7L, DAB1, OVOL2, POU3F3, CHRNA7, TNN, LHX6, RELN, MESP1                               |
| 0048870~cell motility                                             | 0.013                   | ASZ1, CX43, ISL1, SHH, TAF7L, DAB1, OVOL2, POU3F3, CHRNA7, TNN, LHX6, RELN, MESP1                               |
| 0016477~cell migration                                            | 0.025                   | DAB1, OVOL2, ASZ1, CX43, POU3F3, LHX6, RELN, TNN, ISL1, MESP1, SHH                                              |
| 0006928~cell motion                                               | 0.037                   | ASZ1, CX43, ISL1, SHH, TAF7L, DAB1, OVOL2, LHX2, POU3F3, RELN, CHRNA7, TNN, LHX6, MESP1                         |
| <b>Annotation Cluster 14</b>                                      | <b>Enrichment Score</b> | <b>1.51</b>                                                                                                     |
| <b>GO Term</b>                                                    | <b>p-value</b>          | <b>Genes</b>                                                                                                    |
| 0043414~biopolymer methylation                                    | 0.015                   | SATB1, MAEL, PIWIL2, TDRD1, HELLS, SUV39H2                                                                      |
| 0032259~methylation                                               | 0.022                   | SATB1, MAEL, PIWIL2, TDRD1, HELLS, SUV39H2                                                                      |
| 0006730~one-carbon metabolic process                              | 0.090                   | SATB1, MAEL, PIWIL2, TDRD1, HELLS, SUV39H2                                                                      |
| <b>Annotation Cluster 15</b>                                      | <b>Enrichment Score</b> | <b>1.36</b>                                                                                                     |
| <b>GO Term</b>                                                    | <b>p-value</b>          | <b>Genes</b>                                                                                                    |
| 0045727~positive regulation of translation                        | 0.003                   | KRT17, PIWIL2, DAZL, LIN28A                                                                                     |
| 0032270~positive regulation of cellular protein metabolic process | 0.146                   | KRT17, PIWIL2, DAZL, RICTOR, LIN28A                                                                             |



|                                                            |                         |                                     |
|------------------------------------------------------------|-------------------------|-------------------------------------|
| 0051247~positive regulation of protein metabolic process   | 0.181                   | KRT17, PIWIL2, DAZL, RICTOR, LIN28A |
| <b>Annotation Cluster 16</b>                               | <b>Enrichment Score</b> | <b>1.25</b>                         |
| <b>GO Term</b>                                             | <b>p-value</b>          | <b>Genes</b>                        |
| 0045109~inGO Termediate filament organization              | 0.028                   | KRT17, KRT14, SHH                   |
| 0045104~inGO Termediate filament cytoskeleton organization | 0.073                   | KRT17, KRT14, SHH                   |
| 0045103~inGO Termediate filament-based process             | 0.091                   | KRT17, KRT14, SHH                   |
