# Supplementary material for: Sertoli-cell-specific knockout of connexin 43 leads to multiple alterations in testicular gene expression in prepubertal mice
Source: PubMed Central journal article supplement — Dis Model Mech. 2012 Jun 14;5(6):895–913. doi: 10.1242/dmm.008649 (PMC3484871; doi:10.1242/dmm.008649), 2012-06-14
Supplement: supp_008649_DMM008649FigS3.pdf [file supp_008649_DMM008649FigS3.pdf]

**Supplemental Table 3**

| <b>ID</b> | <b>Molecules in Network</b>                                                                                                                                                                                                                                                                                           | <b>Score</b> | <b>Focus Molecules</b> | <b>Top Functions</b>                                                                                     |
|-----------|-----------------------------------------------------------------------------------------------------------------------------------------------------------------------------------------------------------------------------------------------------------------------------------------------------------------------|--------------|------------------------|----------------------------------------------------------------------------------------------------------|
| <b>1</b>  | Ccl9, CDKN2A, CRKL, CXCL9, DAB1, DAZ2, DDX4, DNMT3B, ERK, FAM3B, GAD1, GAS2, CX43, Histone h3, HMGA1, HOXA11, IFIT1B, ligp1/ligp1b, IL12 (complex), Interferon alpha, IRF7, KPNA2, LTB, MHC CLASS I (family), Ms4a4b (includes others), PIWIL2, PSMB9, RELN, RNA polymerase II, STAT1, TAP1, Tgtp1, UPP1, USP18, ZBP1 | 33           | 26                     | Infectious Disease, Gene Expression, Antigen Presentation                                                |
| <b>2</b>  | ABCB7, ACTB, B2M, CASP9, Ccl6, CCL21, CD274, CXCL9, EAF2, EBI3, ERO1L, FGL2, GBP4, Gbp4, Gbp8, GBP2 (includes EG:14469), IFIT1B, IFNB1, IFNG, IGF2BP1, Igtp, ligp1/ligp1b, IL5, IL27, IL7R, ISG15, NR3C1, OAS2, Oasl2, PCP4, SERINC3, SOCS1, STAT2, Tgtp1, TXN (includes EG:116484)                                   | 18           | 18                     | Cell-To-Cell Signaling and Interaction, Hematological System Development and Function, Tissue Morphology |
| <b>3</b>  | ACTA1, BAZ1A, BCL2L1, BIRC5, CCND1, CHRNA7, CRABP1, CXCL3, CXCL10, CYP2F1, DKK2, ESR2, FABP4, GGT1, GNAQ, GTF2A1, HELLS, HMGCR, IKBKB, JAK2, LEP, Mapk, MAT2A, MYH3, Myhs, MYOD1, NFKBIE, RBBP4, SOCS3, STAT1, SUV39H2, TNF, TNN, TNNC2, YY1                                                                          | 15           | 16                     | Gene Expression, Cancer, Cardiac Necrosis/Cell Death                                                     |
| <b>4</b>  | ARG2, ARL5B, CBX2, CDK2, DMRT1, DMRTC2, DUSP4, E2F1, E2F4, FGFR2, FOXL2, FSHB, ISL1, LHB, MPHOSPH9, NR1H3, NR5A1, OSBP2, PIN1, PPM1H, SMAD3, SOHLH1, STAR, STRA8, UTF1, ZFP36                                                                                                                                         | 13           | 13                     | Embryonic Development, Organ Development, Organismal Development                                         |
| <b>5</b>  | AK4, ARIH1, CCL17, CDK2, CEBPZ, CLGN, E330020D12Rik, ERK1/2, F2RL1, FBXW12, FIGLA, FOS, GLI2, HDAC2, Histone h3, Histone h4, IL13, IL1B, Jnk, JUN, KITLG, LDHC, MAPK14, P38 MAPK, RASA2, RB1, RNA polymerase II, SOCS3, SRF, Taf7I, TCOF1, TDRD1, TLR4, TNFSF11, UBA3                                                 | 12           | 14                     | Gene Expression, Tissue Morphology, Cellular Development                                                 |

|           |                                                                                                                                                                                                                                                |    |    |                                                                                                                          |
|-----------|------------------------------------------------------------------------------------------------------------------------------------------------------------------------------------------------------------------------------------------------|----|----|--------------------------------------------------------------------------------------------------------------------------|
| <b>6</b>  | ADAD1, BCL2, BCL2L1, CD8A, CHCHD2, CSF1, CSF1R, DNAH12, Fcer1, FDFT1, HMGCR, IFIT3, IgG1, Igm, IL4, IL21, IL27, ITGAV, ITGB3, KCNAB2, LCK, MT1E, NFATC1, PHB, PLCG2, POU2F2, RASGRF1, RHOA, RORA, S100A9, SATB1, SPATA19, VAV3, YBX2, ZBTB16   | 12 | 14 | Cell-To-Cell Signaling and Interaction, Hematological System Development and Function, Cellular Growth and Proliferation |
| <b>7</b>  | Akt, Alp, BCL2, BCL2L1, BRCA1, BRCA2, CASP3, CCND1, CDKN1A, CDKN2A, CNR1, CREBBP, DDX25, EP300, GATA1, HDAC1, HNF1A, HOXA10, HTT, KIF12, KRT14, MDM2, MEIS2, NFKBIA, PLCB1, RAD51, RAP1GAP, RB1, RNASE4, RUNX2, SLC7A2, STAT1, TP53, TTK, WDR5 | 11 | 13 | Gene Expression, Cancer, Cellular Development                                                                            |
| <b>8</b>  | Actg2, ALDOB, CDH1, CNN1, DYNC2LI1, FHL1, FOXA1, FOXA2, GATA6, GLI1, GLI2, GRHL1, HDAC1, HDAC2, HHIP, HLTf, HNF1B, HNF4A, IKZF3, KRT8, KRT17, LRP5, Mi2, MYBPC1, MYOCD, NR1H4, NR5A2, ONECUT1, PAX2, RBBP4, RHPN2, SALL1, SALL4, SHH, SLC2A2   | 11 | 13 | Gene Expression, Embryonic Development, Organismal Development                                                           |
| <b>9</b>  | Akr1b7, Alp, APBB1, APP, AQP7, ATF2, BLNK, CAV1, CCND1, CCND2, CCND3, CEBPA, CEBPB, CTNNB1, DKK1, DTX2, EGFR, FABP4, FGF8, FKBP6, Histone h3, MAP4K1, MESP1, MSX1, MYC, MYOG, NDRG4, PHLDA2, PPARd, PPARG, PRKG2, PRSS8, RUNX2, Tex19.1, WNT3A | 11 | 13 | Cellular Development, Gene Expression, Cell Cycle                                                                        |
| <b>10</b> | ARC, CAMK4, CEBPB, CREB1, Creb, Crem, DLG4, DUSP14, EGR4, FMR1, GABPA, IRS2, NXF1, NXF2/NXF2B, PAK1, PDXK, PIK3CB, PPARA, PPARd, PPARGC1A, SIK1                                                                                                | 8  | 9  | Neurological Disease, Organismal Injury and Abnormalities, Tissue Morphology                                             |
