# Supplementary material for: Sertoli-cell-specific knockout of connexin 43 leads to multiple alterations in testicular gene expression in prepubertal mice
Source: PubMed Central journal article supplement — Dis Model Mech. 2012 Jun 14;5(6):895–913. doi: 10.1242/dmm.008649 (PMC3484871; doi:10.1242/dmm.008649), 2012-06-14
Supplement: supp_008649_DMM008649FigS4.pdf [file supp_008649_DMM008649FigS4.pdf]

**Supplemental Table 4**

| ACCN        | Gene Symbol  | Gene Name                                 | T-Test p-value | RP p-value | FC KO WT    |
|-------------|--------------|-------------------------------------------|----------------|------------|-------------|
| BE945380.1  | <i>Ajap1</i> | adherens junction associated protein 1    | 0.39           | 0.11       | 1.3         |
| NM_010288.2 | <i>Gja1</i>  | gap junction protein, alpha 1             | 0.00           | 0.00       | <b>-3.4</b> |
| NM_016975.2 | <i>Gja3</i>  | gap junction protein, alpha 3             | 0.35           | 0.21       | 1.2         |
| NM_008120.2 | <i>Gja4</i>  | gap junction protein, alpha 4             | 0.47           | 0.51       | 1.1         |
| BB627115.1  | <i>Gja5</i>  | gap junction protein, alpha 5             | 0.50           | 0.21       | 1.2         |
| BY760342.1  | <i>Gja6</i>  | gap junction protein, alpha 6             | 0.34           | 0.07       | -1.7        |
| CF739442.1  | <i>Gja8</i>  | gap junction protein, alpha 8             | 0.66           | 0.56       | 1.1         |
| NM_008123.2 | <i>Gja8</i>  | gap junction protein, alpha 8             | 0.77           | 0.59       | 1.0         |
| NM_008124.2 | <i>Gjb1</i>  | gap junction protein, beta 1              | 0.88           | 0.09       | -1.1        |
| NM_008125.2 | <i>Gjb2</i>  | gap junction protein, beta 2              | 0.27           | 0.17       | -1.2        |
| NM_008126.1 | <i>Gjb3</i>  | gap junction protein, beta 3              | 0.66           | 0.03       | -1.3        |
| NM_008127.3 | <i>Gjb4</i>  | gap junction protein, beta 4              | 0.53           | 0.56       | 1.1         |
| NM_010291.2 | <i>Gjb5</i>  | gap junction protein, beta 5              | 0.95           | 0.24       | 1.0         |
| NM_008128.3 | <i>Gjb6</i>  | gap junction protein, beta 6              | 0.53           | 0.53       | 1.1         |
| NM_008122.1 | <i>Gjc1</i>  | gap junction protein, gamma 1             | 0.02           | 0.02       | <b>-1.6</b> |
| NM_080454.2 | <i>Gjc2</i>  | gap junction protein, gamma 2             | 0.43           | 0.53       | 1.1         |
| NM_010290.2 | <i>Gjd2</i>  | gap junction protein, delta 2             | 0.39           | 0.05       | 1.3         |
| NM_178596.1 | <i>Gjd3</i>  | gap junction protein, delta 3             | 0.05           | 0.04       | <b>-1.4</b> |
| NM_153086.3 | <i>Gjd4</i>  | gap junction protein, delta 4             | 0.79           | 0.62       | 1.0         |
| NM_198652.1 | <i>Hjrp</i>  | Holliday junction recognition protein     | 0.36           | 0.21       | 1.2         |
| AI020871.1  | <i>Jam2</i>  | junction adhesion molecule 2              | 0.31           | 0.01       | 1.5         |
| AK039971.1  | <i>Jam3</i>  | junction adhesion molecule 3              | 0.62           | 0.15       | 1.1         |
| NM_023277.1 | <i>Jam3</i>  | junction adhesion molecule 3              | 0.94           | 0.36       | 1.0         |
| BU840990.1  | <i>Jmy</i>   | junction-mediating and regulatory protein | 0.05           | 0.41       | 1.1         |

|             |              |                                                   |      |      |      |
|-------------|--------------|---------------------------------------------------|------|------|------|
| NM_021310.2 | <i>Jmy</i>   | junction-mediating and regulatory protein         | 0.22 | 0.06 | -1.3 |
| NM_028001.1 | <i>Jsrp1</i> | junctional sarcoplasmic reticulum protein 1       | 0.90 | 0.41 | -1.0 |
| NM_010593.1 | <i>Jup</i>   | junction plakoglobin                              | 0.13 | 0.44 | 1.1  |
| NM_028751.2 | <i>Tjap1</i> | tight junction associated protein 1               | 0.02 | 0.21 | -1.2 |
| NM_009386.1 | <i>Tjp1</i>  | tight junction protein 1                          | 0.74 | 0.38 | -1.0 |
| NM_011597.1 | <i>Tjp2</i>  | tight junction protein 2                          | 0.99 | 0.34 | -1.0 |
| NM_013769.1 | <i>Tjp3</i>  | tight junction protein 3                          | 0.10 | 0.01 | -1.8 |
| NM_172538.2 | <i>Vezt</i>  | vezatin, adherens junctions transmembrane protein | 0.71 | 0.13 | 1.1  |
| AK041354.1  | <i>Vezt</i>  | vezatin, adherens junctions transmembrane protein | 0.80 | 0.59 | 1.0  |
